# Supplementary material for: An ensemble approach to accurately detect somatic mutations using SomaticSeq
Source: PubMed Central journal article supplement (PMC4574535; doi:10.1186/s13059-015-0758-2), 2015-09-17
Supplement: 13059_2015_758_MOESM1_ESM.pdf [file 13059_2015_758_MOESM1_ESM.pdf]

## 1. DETAILED SOMATICSEQ RESULTS

Table 1 summarizes what training data were used for each study in the paper.

**1.1. DREAM Challenge.** The cross validation results for DREAM Challenge are presented in Table 2. We also investigated SomaticSeq’s accuracy in challenging regions (e.g., regions of low mappability, low complexity, etc). DREAM Challenge simulated only 25 mutations in regions ENCODE considered to be unmappable (in the wgEncodeDacMapabilityConsensusExcludable.bed file from UCSC). 24 out of those 25 mutations were captured by the combined five callers, and a total of 2,939 false positives were called. Thus, before any filtering, the union of 5 call sets had a  $F_1$  score of 1.61% (recall of 96.0% and precision of 0.81%). After 10 cross-validations by SomaticSeq, the  $F_1$  scores for DREAM Challenge’s settings A, B, C, and D were 96.7%, 94.4%, 94.0%, and 84.3%. Their recalls were 93.6%, 94.4%, 93.6%, and 77.6%. Their precisions were 100%, 94.4%, 94.4%, and 92.4%. These results were comparable to rest of the data sets in Table 2, but keep in mind that only 25 mutations were simulated in those regions, and did not necessarily represent the reality. In general, SomaticSeq is not expected to perform too well in low mappability regions in its current implementation, because all the callers it has incorporated depend on short read mapping as a precursor to variant calling.

**1.2. *in silico* titration.** The cross validation results for *in silico* titration are presented in Table 3. SomaticSeq\* (one asterisk) results in Table 3 were obtained as follows: for each of the 6 *in silico* settings, we randomly split them into two halves. We combined one half of them into a single data set for training. Then, we used that trained classifier to predict mutation status for each of the other halves of the 6 *in silico* settings. We ensured that the training and target data did not overlap. We then reversed the training/testing in the other direction, and averaged the two results. The results from this method were equally good or better than cross validation. This was likely due to the fact that, with 6 times the amount of training data in this method versus cross validation, a more accurate trained model was built. The extra data from the different *in silico* settings differed only in the number of variant reads, and this small discrepancy in the number of variant reads did not disrupt the accuracy of the trained model.

SomaticSeq\*\* (two asterisks) results in Table 3 were trained from the combined DREAM Settings A and B. Keep in mind that the DREAM Challenge and *in silico* titration data were a gross mismatch in terms of sequencing characteristics. DREAM Challenge contained synthetic mutations, where the tumor and normal reads came from a single experiment (reads randomly split into the designated tumor and normal, with synthetic mutation spiked into the tumor). The *in silico* titration’s tumor and normal came from two different human genomes sequenced at two different sequencing centers. The results were less accurate than cross validation, but still substantively more accurate than any individual tool. This implies that the DREAM Challenge data is sufficiently realistic, that the model trained from DREAM Challenge substantially improved prediction results over any individual tool.

**1.3. SomaticSpike titration.** The detailed cross validation results for SomaticSpike are presented in Tables 4 to 8.

## 2. ADDITIONAL SOMATICSEQ ANALYSES

**2.1. Simple consensus.** A simple consensus is to take the intersections of multiple callers (i.e., mutation calls agreed upon by multiple tools), and label calls with at least N number of tools as high confidence calls. This simple approach improved accuracy over individual callers as well, but paled in comparison with SomaticSeq, and was less robust over different types of data. The  $F_1$  score, sensitivity, and precision for every combination of somatic SNV call consensus are summarized in Tables 9, 10, and 11. Tables 12 shows the sensitivity of the real data with this consensus approach.

**2.2. Reduced number of tools incorporated.** The bulk of the computing resources used in SomaticSeq is running the individual tools it has incorporated. While the addition of each tool adds to our combined sensitivity, there are enough features in our model so that our precisions are not overly dependent on any of the tools. Fig. 1 shows how the  $F_1$  score scales with the number of tools for SNVs. The gain in accuracy is more pronounced in the most challenging data sets, but the addition of each tool shows diminishing return. Tables 13, 14, and 15 detail the  $F_1$  score, recall, and precision of SomaticSeq incorporating every possible combination of tools.

2.2.1. *Negative predictive values (NPV)*. Negative predictive value (NPV) is the fraction of true negative calls over all negative calls. Since the rate of somatic mutation is typically around 1 out of a million, NPV over the whole genome is close to 1 for all sensible somatic mutation callers. However, we calculated our NPV not over the entire genome, but over the union of call sets. This evaluates SomaticSeq’s ability to filter out false positives from the call set. Results are shown in Table 16.

2.3. **Reduced feature sets.** SomaticSeq used up to 72 features to discriminate true somatic mutations from the data sets. All features have some predictive values, but some have much greater predictive values than others. We have already listed the top 18 features in the Method section of the main text, and also tested the algorithm with only the top 5, 10, and 20 features (Table 17). The prediction accuracies improve with more features, but diminish after about 20 most valuable features (Fig. 2). The top 5 features were strand bias odd ratio, normal read depth, tumor mapping quality, MuTect classification, and variant reverse read counts (should be the same weight as forward read counts, but in choosing top 5, only one made the cut). The next 5 top features rounding up the top 10 were variant forward read counts, VarDict classification, VarDict’s somatic score, normal mapping quality, and JointSNVMix2 classification. Fig. 3 visualizes the breakdown of true somatic mutations vs. false positives for some features of different importance in the Stage 3 of DREAM Challenge.

The classifier from a trained model is an ensemble of decision trees with different relative weights. The number of decision trees is the number of iterations during training. Decision trees in the beginning are more heavily weighted than decision trees at the end. The decision tree shown in the main manuscript is also represented as Fig. 4. `if_MuTect`, `if_VarDict`, `if_JointSNVMix2` are classifications by these tools, and hold binary values of 0 or 1. `if_dbsnp` represents membership in dbSNP, and also holds binary values of 0 and 1. `VarScan2_Score` is the Phred-scaled Fisher’s exact test p-value reported by VarScan2. SomaticSeq has in essence reclassified VarScan2’s calls in this tree to have a more strict p-value cut off. `T_MQ` is tumor mapping quality which ranges from 0 to 60 for BWA aligned reads.

Some features were turned off in certain cases, e.g., all features related to dbSNP were turned off for *in silico* titration and SomaticSpike analysis, because most virtual somatic mutations in those two data sets were in dbSNP, but in reality mutation candidates in dbSNP tend to be germline variant false positives. Features related to SomaticSniper and JointSNVMix2 were effectively turned off for INDEL analyses because these two tools do not call INDELS. Indel length was effectively turned off for SNV because it’s always zero.

2.4. **Reduced size of training sets.** Tables 18 and 19 (Fig. 5 and 6) shows SomaticSeq accuracy as a function of the size of training set. The prediction accuracy improved with increasing size, but reached diminishing return when there were about 200 true positives in the training set. A call set typically has more false positive than true positives, thus we recommend the size of training set should be large enough to include at least 100 true positives. If in rare cases when the number of true positives outnumbers false positives, the size of the training set should include at least 100 false positives instead.

### 3. DATA AVAILABILITY

For the DREAM Somatic Mutation Challenge data, GeneTorrent is required to download the BAM files. GeneTorrent is available at UCSC: <https://cghub.ucsc.edu/software/downloads.html>. The public key for DREAM Challenge is located at [http://dream.annailabs.com/dream\\_public.pem](http://dream.annailabs.com/dream_public.pem). Specifically, we have used Stage 2 and Stage 3 data from DREAM Challenge in this paper. The URL’s of the data for GeneTorrent are:

- Stage 2 Normal:  
<https://dream.annailabs.com/cghub/data/analysis/download/865fa3d6-2024-47cf-bf66-c258f8c0efcf>
- Stage 2 Tumor:  
<https://dream.annailabs.com/cghub/data/analysis/download/7cf8416e-6055-4a0e-86ee-b719db9fbc16>
- Stage 3 Normal:  
<https://dream.annailabs.com/cghub/data/analysis/download/b19d76a0-a487-4c50-8f9c-3b4d5e53239d>

| Test Set                                     | Training Set                     | Validation Method                             |
|----------------------------------------------|----------------------------------|-----------------------------------------------|
| Original DREAM Challenge Stage 3             | Modified DREAM Challenge Stage 2 | Compare to ground truth                       |
| Modified DREAM Challenge Stage 3             | Half of the Test Data            | Cross validation with ground truth            |
| <i>in silico</i> Titration and Somatic-Spike | Half of the Test Data            | Cross validation with constructed truth set   |
| COLO-829                                     | Original DREAM Challenge Stage 3 | Compare to experimentally validated mutations |
| CLL1                                         | Original DREAM Challenge Stage 3 | Compare to experimentally validated mutations |

TABLE 1. Specifying what training data are used for each test data set in this study, and what data is used for validation.

- Stage 3 Tumor:  
<https://dream.annalabs.com/cghub/data/analysis/download/8fe6fc33-2daf-4393-929f-7c3493d04bef>

For our *in silico* titration, the two genomes can be downloaded at the following locations:

- NA12878 (virtual normal):  
<ftp://ftp.sra.ebi.ac.uk/vol1/fastq/ERR194/ERR194147>
- NS12911 (virtual tumor):  
<http://www.ncbi.nlm.nih.gov/sra/SRX1016818>

For SomaticSpike:

- NA12878 (virtual normal):  
[ftp://ftp-trace.ncbi.nih.gov/1000genomes/ftp/technical/working/20120117\\_ceu\\_trio\\_b37\\_decoy/](ftp://ftp-trace.ncbi.nih.gov/1000genomes/ftp/technical/working/20120117_ceu_trio_b37_decoy/). The file names are CEUTrio.HiSeq.WGS.jaffe.b37\_decoy.NA12878.chr\*.clean.dedup.recal.20120117.bam.
- NA12891 (virtual tumor):  
[ftp://ftp-trace.ncbi.nih.gov/1000genomes/ftp/technical/working/20120117\\_ceu\\_trio\\_b37\\_decoy/](ftp://ftp-trace.ncbi.nih.gov/1000genomes/ftp/technical/working/20120117_ceu_trio_b37_decoy/). The file name is CEUTrio.HiSeq.WGS.b37\_decoy.NA12891.clean.dedup.recal.20120117.bam.

For the real data, they are downloaded from European Genome Archive (EGA).

- CLL1:  
<https://www.ebi.ac.uk/ega/datasets/EGAD00001000023>
- COLO829:  
<https://www.ebi.ac.uk/ega/studies/EGAS00000000052>

| DREAM          | Recall |       |       |       | Precision |       |       |       | F <sub>1</sub> Score |       |       |       |
|----------------|--------|-------|-------|-------|-----------|-------|-------|-------|----------------------|-------|-------|-------|
| SNV            | A      | B     | C     | D     | A         | B     | C     | D     | A                    | B     | C     | D     |
| MuTect         | 0.931  | 0.721 | 0.849 | 0.648 | 0.684     | 0.627 | 0.664 | 0.601 | 0.789                | 0.671 | 0.745 | 0.624 |
| VarScan        | 0.711  | 0.689 | 0.503 | 0.468 | 0.245     | 0.239 | 0.186 | 0.176 | 0.364                | 0.354 | 0.272 | 0.255 |
| VarScan+Filter | 0.666  | 0.648 | 0.459 | 0.432 | 0.502     | 0.496 | 0.411 | 0.396 | 0.573                | 0.562 | 0.434 | 0.413 |
| SomaticSniper  | 0.776  | 0.755 | 0.542 | 0.524 | 0.493     | 0.486 | 0.404 | 0.396 | 0.603                | 0.591 | 0.463 | 0.451 |
| Sniper+Filter  | 0.746  | 0.726 | 0.519 | 0.503 | 0.797     | 0.792 | 0.731 | 0.725 | 0.770                | 0.758 | 0.607 | 0.594 |
| JointSNVMix    | 0.899  | 0.839 | 0.692 | 0.638 | 0.404     | 0.388 | 0.343 | 0.325 | 0.558                | 0.530 | 0.459 | 0.431 |
| VarDict        | 0.883  | 0.726 | 0.731 | 0.555 | 0.567     | 0.518 | 0.520 | 0.451 | 0.690                | 0.605 | 0.607 | 0.498 |
| Union of Tools | 0.961  | 0.942 | 0.892 | 0.851 | 0.138     | 0.135 | 0.129 | 0.124 | 0.241                | 0.237 | 0.226 | 0.216 |
| SomaticSeq     | 0.937  | 0.923 | 0.875 | 0.832 | 0.992     | 0.997 | 0.996 | 0.994 | 0.964                | 0.958 | 0.932 | 0.905 |
| INDEL          |        |       |       |       |           |       |       |       |                      |       |       |       |
| Indelocator    | 0.170  | 0.088 | 0.037 | 0.018 | 0.248     | 0.146 | 0.067 | 0.033 | 0.202                | 0.110 | 0.048 | 0.023 |
| VarScan        | 0.375  | 0.361 | 0.202 | 0.186 | 0.154     | 0.149 | 0.089 | 0.083 | 0.218                | 0.211 | 0.124 | 0.115 |
| VarScan+Filter | 0.127  | 0.123 | 0.069 | 0.065 | 0.238     | 0.233 | 0.146 | 0.139 | 0.165                | 0.161 | 0.094 | 0.089 |
| VarDict        | 0.753  | 0.640 | 0.616 | 0.490 | 0.667     | 0.630 | 0.621 | 0.565 | 0.707                | 0.635 | 0.619 | 0.525 |
| Union of Tools | 0.847  | 0.791 | 0.762 | 0.667 | 0.212     | 0.201 | 0.195 | 0.175 | 0.339                | 0.320 | 0.310 | 0.277 |
| SomaticSeq     | 0.807  | 0.776 | 0.754 | 0.656 | 0.952     | 0.985 | 0.986 | 0.985 | 0.874                | 0.868 | 0.855 | 0.788 |

TABLE 2. VarScan+Filter and Sniper+Filter contains a subset of calls where the author-recommended false positive filters are applied to the original call sets. Setting A: Stage 3 data straight up. Setting B: the matched normal is contaminated with 5% tumor. Setting C: the tumor is contaminated with 30% normal, in which case variant allele frequencies of 35%, 23%, and 14% are present in the tumor sample. Setting D: combination of C and D, i.e., the normal is contaminated with 5% tumor, and tumor is contaminated with 30% normal. The ensemble contained all calls from VarScan2 and SomaticSniper (without false positive filter), plus with VarDict’s internal filters relaxed.

| TYPE             | Recall |       |       |       |       |       | Precision |       |       |       |       |       | F <sub>1</sub> Score |       |       |       |       |       |
|------------------|--------|-------|-------|-------|-------|-------|-----------|-------|-------|-------|-------|-------|----------------------|-------|-------|-------|-------|-------|
|                  | 50%    |       | 25%   |       | 15%   |       | 50%       |       | 25%   |       | 15%   |       | 50%                  |       | 25%   |       | 15%   |       |
|                  | 0%     | 2.5%  | 0%    | 2.5%  | 0%    | 2.5%  | 0%        | 2.5%  | 0%    | 2.5%  | 0%    | 2.5%  | 0%                   | 2.5%  | 0%    | 2.5%  | 0%    | 2.5%  |
| VAF <sub>T</sub> | 0.991  | 0.734 | 0.957 | 0.706 | 0.787 | 0.551 | 0.250     | 0.198 | 0.244 | 0.192 | 0.210 | 0.157 | 0.400                | 0.312 | 0.389 | 0.302 | 0.331 | 0.244 |
| VAF <sub>N</sub> | 1.000  | 1.000 | 0.606 | 0.599 | 0.078 | 0.070 | 0.170     | 0.170 | 0.111 | 0.109 | 0.016 | 0.014 | 0.291                | 0.291 | 0.187 | 0.185 | 0.026 | 0.024 |
| VarScan + Filter | 0.896  | 0.896 | 0.541 | 0.534 | 0.071 | 0.064 | 0.360     | 0.360 | 0.253 | 0.251 | 0.043 | 0.039 | 0.514                | 0.514 | 0.345 | 0.342 | 0.053 | 0.048 |
| SomaticSniper    | 1.000  | 0.992 | 0.791 | 0.783 | 0.219 | 0.212 | 0.208     | 0.207 | 0.172 | 0.171 | 0.054 | 0.053 | 0.344                | 0.342 | 0.283 | 0.280 | 0.087 | 0.084 |
| Sniper + Filter  | 0.892  | 0.885 | 0.705 | 0.698 | 0.199 | 0.193 | 0.460     | 0.458 | 0.402 | 0.400 | 0.160 | 0.156 | 0.607                | 0.604 | 0.512 | 0.508 | 0.177 | 0.173 |
| JointSNVMix      | 1.000  | 0.943 | 0.968 | 0.904 | 0.680 | 0.619 | 0.104     | 0.099 | 0.101 | 0.095 | 0.073 | 0.067 | 0.189                | 0.179 | 0.184 | 0.172 | 0.133 | 0.121 |
| VarDict          | 0.819  | 0.620 | 0.805 | 0.583 | 0.629 | 0.307 | 0.308     | 0.252 | 0.305 | 0.241 | 0.255 | 0.143 | 0.448                | 0.359 | 0.442 | 0.341 | 0.363 | 0.296 |
| Union of Tools   | 1.000  | 1.000 | 0.995 | 0.985 | 0.917 | 0.830 | 0.061     | 0.061 | 0.061 | 0.060 | 0.056 | 0.051 | 0.116                | 0.116 | 0.115 | 0.114 | 0.106 | 0.097 |
| SomaticSeq       | 0.947  | 0.936 | 0.917 | 0.903 | 0.721 | 0.684 | 0.963     | 0.969 | 0.978 | 0.985 | 0.959 | 0.978 | 0.955                | 0.952 | 0.946 | 0.942 | 0.823 | 0.805 |
| SomaticSeq*      | 0.915  | 0.947 | 0.917 | 0.932 | 0.698 | 0.703 | 1.000     | 1.000 | 1.000 | 1.000 | 1.000 | 1.000 | 0.955                | 0.973 | 0.957 | 0.965 | 0.822 | 0.826 |
| SomaticSeq**     | 0.983  | 0.960 | 0.949 | 0.846 | 0.651 | 0.432 | 0.552     | 0.546 | 0.543 | 0.515 | 0.450 | 0.351 | 0.707                | 0.696 | 0.691 | 0.640 | 0.532 | 0.387 |
| INDEL            |        |       |       |       |       |       |           |       |       |       |       |       |                      |       |       |       |       |       |
| Indelocator      | 0.810  | 0.334 | 0.046 | 0.012 | 0.000 | 0.000 | 0.663     | 0.448 | 0.101 | 0.029 | 0.001 | 0.000 | 0.729                | 0.382 | 0.064 | 0.017 | 0.001 | 0.000 |
| VarScan          | 0.963  | 0.961 | 0.403 | 0.399 | 0.041 | 0.036 | 0.245     | 0.244 | 0.119 | 0.118 | 0.013 | 0.012 | 0.390                | 0.390 | 0.184 | 0.182 | 0.020 | 0.018 |
| VarScan + Filter | 0.417  | 0.417 | 0.177 | 0.176 | 0.018 | 0.016 | 0.245     | 0.245 | 0.121 | 0.121 | 0.014 | 0.012 | 0.309                | 0.309 | 0.144 | 0.143 | 0.015 | 0.014 |
| VarDict          | 0.852  | 0.631 | 0.815 | 0.579 | 0.612 | 0.299 | 0.268     | 0.213 | 0.259 | 0.199 | 0.208 | 0.114 | 0.408                | 0.319 | 0.393 | 0.296 | 0.311 | 0.165 |
| Union of Tools   | 0.979  | 0.976 | 0.871 | 0.764 | 0.765 | 0.497 | 0.084     | 0.084 | 0.075 | 0.067 | 0.067 | 0.044 | 0.155                | 0.154 | 0.139 | 0.134 | 0.123 | 0.082 |
| SomaticSeq       | 0.864  | 0.864 | 0.747 | 0.668 | 0.688 | 0.399 | 0.966     | 0.961 | 0.971 | 0.940 | 0.917 | 0.951 | 0.912                | 0.910 | 0.844 | 0.793 | 0.786 | 0.562 |
| SomaticSeq*      | 0.839  | 0.858 | 0.782 | 0.695 | 0.596 | 0.403 | 0.998     | 0.998 | 0.998 | 0.998 | 0.998 | 0.997 | 0.912                | 0.923 | 0.877 | 0.819 | 0.746 | 0.574 |
| SomaticSeq**     | 0.542  | 0.416 | 0.556 | 0.322 | 0.445 | 0.169 | 0.785     | 0.737 | 0.789 | 0.685 | 0.750 | 0.532 | 0.642                | 0.531 | 0.652 | 0.438 | 0.559 | 0.256 |

TABLE 3. Prior probability of somatic mutation is enforced to be 1 in a million in order to get a more realistic performance. VAF<sub>N</sub> and VAF<sub>T</sub> stand for variant allele frequencies of the Normal and the Tumor, respectively. VarScan+Filter and Sniper+Filter are subsets of VarScan2 and SomaticSniper output, respectively, with author-recommended false positive filters applied. The trained model for SomaticSeq\* is the combined settings of the *in silico* titration randomly split into half, which has 6 times the data size used during cross validation. The trained model for SomaticSeq\*\* is the DREAM Challenge with settings A and B combined, with dbSNP features discarded.

| 10X            | Recall |       |       |       | Precision |       |       |       | F <sub>1</sub> Score |       |       |       |
|----------------|--------|-------|-------|-------|-----------|-------|-------|-------|----------------------|-------|-------|-------|
| VAF            | 5%     | 10%   | 20%   | 40%   | 5%        | 10%   | 20%   | 40%   | 5%                   | 10%   | 20%   | 40%   |
| MuTect         | 0.028  | 0.137 | 0.457 | 0.830 | 0.079     | 0.297 | 0.584 | 0.719 | 0.041                | 0.188 | 0.513 | 0.770 |
| VarScan        | 0.031  | 0.129 | 0.481 | 0.876 | 0.001     | 0.005 | 0.019 | 0.035 | 0.002                | 0.010 | 0.037 | 0.066 |
| VarScan+Filter | 0.009  | 0.059 | 0.279 | 0.619 | 0.010     | 0.061 | 0.233 | 0.403 | 0.009                | 0.060 | 0.254 | 0.488 |
| SomaticSniper  | 0.008  | 0.079 | 0.386 | 0.850 | 0.003     | 0.030 | 0.133 | 0.252 | 0.004                | 0.044 | 0.198 | 0.389 |
| Sniper+Filter  | 0.006  | 0.051 | 0.259 | 0.610 | 0.010     | 0.086 | 0.325 | 0.531 | 0.007                | 0.064 | 0.288 | 0.568 |
| JointSNVMix    | 0.006  | 0.070 | 0.395 | 0.882 | 0.001     | 0.017 | 0.088 | 0.177 | 0.002                | 0.027 | 0.144 | 0.294 |
| VarDict        | 0.022  | 0.122 | 0.418 | 0.737 | 0.004     | 0.023 | 0.074 | 0.123 | 0.007                | 0.038 | 0.125 | 0.211 |
| Union of Tools | 0.064  | 0.227 | 0.613 | 0.936 | 0.002     | 0.007 | 0.018 | 0.027 | 0.004                | 0.013 | 0.035 | 0.053 |
| SomaticSeq     | 0.014  | 0.140 | 0.487 | 0.857 | 0.722     | 0.889 | 0.952 | 0.988 | 0.028                | 0.242 | 0.645 | 0.918 |

TABLE 4. SomaticSpike. Tumor sequencing depth = 10X. Prior probability of somatic mutation is enforced to be 1 in a million in order to get a more realistic performance.

| 20X            | Recall |       |       |       | Precision |       |       |       | F <sub>1</sub> Score |       |       |       |
|----------------|--------|-------|-------|-------|-----------|-------|-------|-------|----------------------|-------|-------|-------|
| VAF            | 5%     | 10%   | 20%   | 40%   | 5%        | 10%   | 20%   | 40%   | 5%                   | 10%   | 20%   | 40%   |
| MuTect         | 0.141  | 0.426 | 0.811 | 0.959 | 0.135     | 0.321 | 0.473 | 0.515 | 0.138                | 0.366 | 0.598 | 0.670 |
| VarScan        | 0.006  | 0.080 | 0.533 | 0.976 | 0.001     | 0.007 | 0.042 | 0.074 | 0.001                | 0.012 | 0.078 | 0.138 |
| VarScan+Filter | 0.004  | 0.065 | 0.419 | 0.806 | 0.002     | 0.041 | 0.218 | 0.349 | 0.003                | 0.050 | 0.287 | 0.487 |
| SomaticSniper  | 0.009  | 0.131 | 0.628 | 0.976 | 0.002     | 0.034 | 0.143 | 0.206 | 0.004                | 0.054 | 0.233 | 0.340 |
| Sniper+Filter  | 0.007  | 0.104 | 0.492 | 0.809 | 0.008     | 0.099 | 0.344 | 0.463 | 0.008                | 0.101 | 0.405 | 0.589 |
| JointSNVMix    | 0.016  | 0.331 | 0.847 | 0.983 | 0.002     | 0.041 | 0.098 | 0.111 | 0.004                | 0.072 | 0.175 | 0.200 |
| VarDict        | 0.044  | 0.224 | 0.640 | 0.812 | 0.006     | 0.031 | 0.084 | 0.104 | 0.011                | 0.055 | 0.149 | 0.185 |
| Union of Tools | 0.174  | 0.514 | 0.902 | 0.992 | 0.005     | 0.015 | 0.026 | 0.029 | 0.010                | 0.029 | 0.051 | 0.056 |
| SomaticSeq     | 0.115  | 0.395 | 0.816 | 0.977 | 0.860     | 0.932 | 0.971 | 0.996 | 0.203                | 0.555 | 0.887 | 0.986 |

TABLE 5. SomaticSpike. Tumor sequencing depth = 20X. Prior probability of somatic mutation is enforced to be 1 in a million in order to get a more realistic performance.

| 30X            | Recall |       |       |       | Precision |       |       |       | F <sub>1</sub> Score |       |       |       |
|----------------|--------|-------|-------|-------|-----------|-------|-------|-------|----------------------|-------|-------|-------|
| VAF            | 5%     | 10%   | 20%   | 40%   | 5%        | 10%   | 20%   | 40%   | 5%                   | 10%   | 20%   | 40%   |
| MuTect         | 0.265  | 0.649 | 0.911 | 0.982 | 0.152     | 0.306 | 0.382 | 0.400 | 0.194                | 0.416 | 0.538 | 0.568 |
| VarScan        | 0.002  | 0.043 | 0.539 | 0.991 | 0.000     | 0.005 | 0.055 | 0.096 | 0.000                | 0.008 | 0.100 | 0.176 |
| VarScan+Filter | 0.002  | 0.038 | 0.442 | 0.822 | 0.001     | 0.022 | 0.205 | 0.324 | 0.001                | 0.028 | 0.280 | 0.465 |
| SomaticSniper  | 0.010  | 0.150 | 0.750 | 0.992 | 0.002     | 0.035 | 0.153 | 0.193 | 0.004                | 0.056 | 0.254 | 0.323 |
| Sniper+Filter  | 0.007  | 0.128 | 0.611 | 0.823 | 0.006     | 0.102 | 0.351 | 0.422 | 0.007                | 0.113 | 0.446 | 0.557 |
| JointSNVMix    | 0.025  | 0.580 | 0.947 | 0.992 | 0.002     | 0.051 | 0.081 | 0.084 | 0.004                | 0.094 | 0.149 | 0.155 |
| VarDict        | 0.059  | 0.312 | 0.735 | 0.826 | 0.008     | 0.040 | 0.088 | 0.098 | 0.014                | 0.070 | 0.158 | 0.175 |
| Union of Tools | 0.302  | 0.727 | 0.968 | 0.998 | 0.008     | 0.019 | 0.025 | 0.025 | 0.015                | 0.036 | 0.048 | 0.049 |
| SomaticSeq     | 0.213  | 0.615 | 0.911 | 0.988 | 0.861     | 0.946 | 0.981 | 0.998 | 0.342                | 0.745 | 0.945 | 0.993 |

TABLE 6. SomaticSpike. Tumor sequencing depth = 30X. Prior probability of somatic mutation is enforced to be 1 in a million in order to get a more realistic performance.

| 40X            | Recall |       |       |       | Precision |       |       |       | F <sub>1</sub> Score |       |       |       |
|----------------|--------|-------|-------|-------|-----------|-------|-------|-------|----------------------|-------|-------|-------|
| VAF            | 5%     | 10%   | 20%   | 40%   | 5%        | 10%   | 20%   | 40%   | 5%                   | 10%   | 20%   | 40%   |
| MuTect         | 0.328  | 0.752 | 0.953 | 0.985 | 0.150     | 0.288 | 0.339 | 0.347 | 0.206                | 0.417 | 0.500 | 0.513 |
| VarScan        | 0.001  | 0.029 | 0.551 | 0.995 | 0.000     | 0.004 | 0.064 | 0.110 | 0.000                | 0.006 | 0.115 | 0.198 |
| VarScan+Filter | 0.001  | 0.027 | 0.452 | 0.837 | 0.000     | 0.014 | 0.198 | 0.314 | 0.000                | 0.019 | 0.278 | 0.457 |
| SomaticSniper  | 0.005  | 0.158 | 0.825 | 0.996 | 0.001     | 0.036 | 0.164 | 0.191 | 0.002                | 0.059 | 0.273 | 0.321 |
| Sniper+Filter  | 0.005  | 0.136 | 0.685 | 0.838 | 0.004     | 0.099 | 0.356 | 0.404 | 0.004                | 0.115 | 0.469 | 0.545 |
| JointSNVMix    | 0.022  | 0.744 | 0.975 | 0.992 | 0.002     | 0.053 | 0.069 | 0.070 | 0.003                | 0.100 | 0.129 | 0.131 |
| VarDict        | 0.050  | 0.363 | 0.778 | 0.850 | 0.007     | 0.049 | 0.100 | 0.108 | 0.012                | 0.087 | 0.177 | 0.192 |
| Union of Tools | 0.357  | 0.826 | 0.989 | 0.999 | 0.009     | 0.021 | 0.025 | 0.025 | 0.018                | 0.041 | 0.049 | 0.049 |
| SomaticSeq     | 0.268  | 0.724 | 0.941 | 0.990 | 0.858     | 0.960 | 0.985 | 0.999 | 0.409                | 0.826 | 0.962 | 0.994 |

TABLE 7. SomaticSpike. Tumor sequencing depth = 40X. Prior probability of somatic mutation is enforced to be 1 in a million in order to get a more realistic performance.

| 50X            | Recall |       |       |       | Precision |       |       |       | F <sub>1</sub> Score |       |       |       |
|----------------|--------|-------|-------|-------|-----------|-------|-------|-------|----------------------|-------|-------|-------|
| VAF            | 5%     | 10%   | 20%   | 40%   | 5%        | 10%   | 20%   | 40%   | 5%                   | 10%   | 20%   | 40%   |
| MuTect         | 0.388  | 0.817 | 0.967 | 0.989 | 0.159     | 0.286 | 0.321 | 0.326 | 0.226                | 0.423 | 0.482 | 0.490 |
| VarScan        | 0.000  | 0.015 | 0.582 | 0.997 | 0.000     | 0.002 | 0.073 | 0.119 | 0.000                | 0.004 | 0.130 | 0.213 |
| VarScan+Filter | 0.000  | 0.012 | 0.492 | 0.829 | 0.000     | 0.007 | 0.207 | 0.306 | 0.000                | 0.009 | 0.292 | 0.447 |
| SomaticSniper  | 0.005  | 0.138 | 0.869 | 0.997 | 0.001     | 0.032 | 0.175 | 0.195 | 0.002                | 0.052 | 0.291 | 0.326 |
| Sniper+Filter  | 0.005  | 0.120 | 0.736 | 0.829 | 0.004     | 0.086 | 0.367 | 0.395 | 0.004                | 0.101 | 0.490 | 0.535 |
| JointSNVMix    | 0.020  | 0.864 | 0.987 | 0.993 | 0.001     | 0.055 | 0.063 | 0.063 | 0.002                | 0.104 | 0.118 | 0.119 |
| VarDict        | 0.059  | 0.380 | 0.808 | 0.848 | 0.009     | 0.054 | 0.109 | 0.114 | 0.015                | 0.095 | 0.192 | 0.201 |
| Union of Tools | 0.418  | 0.895 | 0.994 | 0.998 | 0.011     | 0.023 | 0.026 | 0.026 | 0.022                | 0.046 | 0.051 | 0.051 |
| SomaticSeq     | 0.324  | 0.708 | 0.946 | 0.993 | 0.873     | 0.968 | 0.988 | 1.000 | 0.472                | 0.881 | 0.966 | 0.996 |

TABLE 8. SomaticSpike. Tumor sequencing depth = 50X. Prior probability of somatic mutation is enforced to be 1 in a million in order to get a more realistic performance.

| Consensus      | DC3A  | DC3B  | DC3C  | DC3D  | $N_0T_{50}$ | $N_{2.5}T_{50}$ | $N_0T_{25}$ | $N_{2.5}T_{25}$ | $N_0T_{15}$ | $N_{2.5}T_{15}$ |
|----------------|-------|-------|-------|-------|-------------|-----------------|-------------|-----------------|-------------|-----------------|
| MV             | 0.787 | 0.648 | 0.626 | 0.477 | 0.698       | 0.569           | 0.488       | 0.364           | 0.079       | 0.035           |
| MJ             | 0.889 | 0.764 | 0.760 | 0.620 | 0.593       | 0.476           | 0.571       | 0.452           | 0.428       | 0.307           |
| MS             | 0.842 | 0.709 | 0.672 | 0.525 | 0.656       | 0.531           | 0.553       | 0.427           | 0.191       | 0.111           |
| MD             | 0.899 | 0.772 | 0.844 | 0.699 | 0.527       | 0.410           | 0.514       | 0.396           | 0.441       | 0.292           |
| VJ             | 0.677 | 0.637 | 0.528 | 0.480 | 0.344       | 0.328           | 0.224       | 0.205           | 0.032       | 0.023           |
| VS             | 0.665 | 0.645 | 0.511 | 0.482 | 0.411       | 0.409           | 0.271       | 0.266           | 0.039       | 0.035           |
| VD             | 0.796 | 0.703 | 0.634 | 0.524 | 0.693       | 0.565           | 0.487       | 0.363           | 0.078       | 0.035           |
| JS             | 0.724 | 0.691 | 0.568 | 0.532 | 0.390       | 0.372           | 0.322       | 0.301           | 0.101       | 0.084           |
| JD             | 0.908 | 0.821 | 0.780 | 0.677 | 0.606       | 0.487           | 0.591       | 0.469           | 0.453       | 0.315           |
| SD             | 0.848 | 0.764 | 0.679 | 0.580 | 0.635       | 0.513           | 0.538       | 0.413           | 0.185       | 0.106           |
| MVJ            | 0.788 | 0.649 | 0.625 | 0.475 | 0.700       | 0.571           | 0.489       | 0.365           | 0.079       | 0.036           |
| MVS            | 0.782 | 0.640 | 0.611 | 0.460 | 0.724       | 0.592           | 0.508       | 0.380           | 0.082       | 0.037           |
| MVD            | 0.810 | 0.667 | 0.645 | 0.490 | 0.813       | 0.661           | 0.585       | 0.431           | 0.099       | 0.042           |
| MJS            | 0.838 | 0.705 | 0.669 | 0.522 | 0.685       | 0.557           | 0.579       | 0.449           | 0.203       | 0.118           |
| MJD            | 0.925 | 0.795 | 0.794 | 0.647 | 0.743       | 0.597           | 0.717       | 0.568           | 0.551       | 0.380           |
| MSD            | 0.862 | 0.725 | 0.690 | 0.536 | 0.746       | 0.600           | 0.637       | 0.486           | 0.229       | 0.128           |
| VJS            | 0.715 | 0.674 | 0.553 | 0.506 | 0.429       | 0.409           | 0.283       | 0.261           | 0.041       | 0.030           |
| VJD            | 0.800 | 0.700 | 0.636 | 0.520 | 0.697       | 0.568           | 0.490       | 0.365           | 0.079       | 0.035           |
| VSD            | 0.786 | 0.692 | 0.617 | 0.506 | 0.714       | 0.583           | 0.503       | 0.375           | 0.081       | 0.036           |
| JSD            | 0.851 | 0.759 | 0.682 | 0.576 | 0.670       | 0.544           | 0.571       | 0.440           | 0.199       | 0.114           |
| MVJS           | 0.778 | 0.637 | 0.608 | 0.458 | 0.725       | 0.593           | 0.509       | 0.381           | 0.082       | 0.037           |
| MVJD           | 0.805 | 0.661 | 0.639 | 0.485 | 0.814       | 0.662           | 0.586       | 0.432           | 0.099       | 0.043           |
| MVSD           | 0.792 | 0.647 | 0.621 | 0.465 | 0.822       | 0.670           | 0.592       | 0.437           | 0.100       | 0.043           |
| MJSD           | 0.857 | 0.721 | 0.686 | 0.533 | 0.782       | 0.633           | 0.670       | 0.514           | 0.245       | 0.138           |
| VJSD           | 0.785 | 0.685 | 0.616 | 0.501 | 0.715       | 0.584           | 0.504       | 0.376           | 0.081       | 0.036           |
| MVJSD          | 0.788 | 0.644 | 0.618 | 0.462 | 0.823       | 0.670           | 0.592       | 0.438           | 0.100       | 0.043           |
| $\geq 2$ tools | 0.672 | 0.651 | 0.623 | 0.584 | 0.247       | 0.246           | 0.244       | 0.235           | 0.208       | 0.157           |
| $\geq 3$ tools | 0.833 | 0.793 | 0.708 | 0.655 | 0.380       | 0.362           | 0.364       | 0.325           | 0.260       | 0.181           |
| $\geq 4$ tools | 0.860 | 0.765 | 0.696 | 0.581 | 0.610       | 0.501           | 0.513       | 0.399           | 0.174       | 0.099           |
| 5 tools        | 0.788 | 0.644 | 0.618 | 0.462 | 0.823       | 0.670           | 0.592       | 0.438           | 0.100       | 0.043           |
| SomaticSeq     | 0.964 | 0.958 | 0.932 | 0.905 | 0.955       | 0.952           | 0.946       | 0.942           | 0.823       | 0.805           |

TABLE 9.  $F_1$  scores of simple consensus. M: MuTect. V: VarScan2. J: JointSNVMix2. S: SomaticSniper. D: VarDict with relaxed filters. MJ represent all calls intersected by MuTect (M) and JointSNVMix2 (J). The first four columns represent the four DREAM Challenge Stage 3 (DC3) settings. The last six columns represent the six *in silico* titration settings. The subscripts denote the expected VAF (%) of the Normal (N) and Tumor (T).



| Consensus      | DC3A  | DC3B  | DC3C  | DC3D  | $N_0T_{50}$ | $N_{2.5}T_{50}$ | $N_0T_{25}$ | $N_{2.5}T_{25}$ | $N_0T_{15}$ | $N_{2.5}T_{15}$ |
|----------------|-------|-------|-------|-------|-------------|-----------------|-------------|-----------------|-------------|-----------------|
| MV             | 0.696 | 0.514 | 0.489 | 0.336 | 0.991       | 0.734           | 0.596       | 0.411           | 0.076       | 0.033           |
| MJ             | 0.883 | 0.681 | 0.676 | 0.496 | 0.991       | 0.734           | 0.938       | 0.687           | 0.639       | 0.425           |
| MS             | 0.767 | 0.580 | 0.534 | 0.375 | 0.990       | 0.734           | 0.775       | 0.551           | 0.215       | 0.119           |
| MD             | 0.909 | 0.700 | 0.813 | 0.599 | 0.983       | 0.708           | 0.949       | 0.677           | 0.777       | 0.468           |
| VJ             | 0.694 | 0.633 | 0.486 | 0.428 | 1.000       | 0.943           | 0.606       | 0.550           | 0.078       | 0.056           |
| VS             | 0.671 | 0.642 | 0.461 | 0.427 | 1.000       | 0.992           | 0.605       | 0.593           | 0.077       | 0.069           |
| VD             | 0.696 | 0.571 | 0.489 | 0.374 | 0.988       | 0.733           | 0.600       | 0.413           | 0.076       | 0.033           |
| JS             | 0.768 | 0.714 | 0.536 | 0.491 | 1.000       | 0.942           | 0.791       | 0.730           | 0.219       | 0.180           |
| JD             | 0.887 | 0.741 | 0.682 | 0.545 | 0.988       | 0.733           | 0.954       | 0.697           | 0.667       | 0.425           |
| SD             | 0.769 | 0.645 | 0.537 | 0.427 | 0.988       | 0.733           | 0.783       | 0.553           | 0.216       | 0.119           |
| MVJ            | 0.685 | 0.506 | 0.478 | 0.328 | 0.991       | 0.734           | 0.596       | 0.411           | 0.076       | 0.033           |
| MVS            | 0.663 | 0.487 | 0.455 | 0.309 | 0.990       | 0.734           | 0.594       | 0.410           | 0.075       | 0.033           |
| MVD            | 0.687 | 0.505 | 0.481 | 0.327 | 0.983       | 0.708           | 0.592       | 0.394           | 0.075       | 0.031           |
| MJS            | 0.759 | 0.574 | 0.529 | 0.372 | 0.990       | 0.734           | 0.775       | 0.551           | 0.215       | 0.119           |
| MJD            | 0.872 | 0.669 | 0.668 | 0.485 | 0.983       | 0.708           | 0.931       | 0.660           | 0.632       | 0.391           |
| MSD            | 0.762 | 0.573 | 0.530 | 0.369 | 0.983       | 0.708           | 0.771       | 0.530           | 0.214       | 0.113           |
| VJS            | 0.665 | 0.608 | 0.458 | 0.405 | 1.000       | 0.942           | 0.605       | 0.549           | 0.077       | 0.056           |
| VJD            | 0.686 | 0.555 | 0.481 | 0.362 | 0.988       | 0.733           | 0.599       | 0.412           | 0.076       | 0.033           |
| VSD            | 0.665 | 0.543 | 0.458 | 0.348 | 0.988       | 0.733           | 0.598       | 0.411           | 0.075       | 0.032           |
| JSD            | 0.761 | 0.630 | 0.532 | 0.416 | 0.988       | 0.733           | 0.783       | 0.553           | 0.216       | 0.119           |
| MVJS           | 0.658 | 0.483 | 0.451 | 0.306 | 0.990       | 0.734           | 0.594       | 0.410           | 0.075       | 0.033           |
| MVJD           | 0.678 | 0.498 | 0.474 | 0.322 | 0.983       | 0.708           | 0.592       | 0.394           | 0.075       | 0.031           |
| MVSD           | 0.659 | 0.481 | 0.453 | 0.304 | 0.983       | 0.708           | 0.591       | 0.394           | 0.074       | 0.031           |
| MJSD           | 0.755 | 0.568 | 0.526 | 0.366 | 0.983       | 0.708           | 0.771       | 0.530           | 0.214       | 0.113           |
| VJSD           | 0.659 | 0.532 | 0.454 | 0.341 | 0.988       | 0.733           | 0.598       | 0.411           | 0.075       | 0.032           |
| MVJSD          | 0.654 | 0.477 | 0.449 | 0.302 | 0.983       | 0.708           | 0.591       | 0.394           | 0.074       | 0.031           |
| $\geq 2$ tools | 0.940 | 0.898 | 0.841 | 0.766 | 1.000       | 0.992           | 0.984       | 0.941           | 0.821       | 0.606           |
| $\geq 3$ tools | 0.901 | 0.830 | 0.691 | 0.615 | 1.000       | 0.943           | 0.950       | 0.826           | 0.637       | 0.423           |
| $\geq 4$ tools | 0.795 | 0.652 | 0.561 | 0.431 | 0.995       | 0.758           | 0.783       | 0.564           | 0.216       | 0.118           |
| 5 tools        | 0.654 | 0.477 | 0.449 | 0.302 | 0.983       | 0.708           | 0.591       | 0.394           | 0.074       | 0.031           |
| SomaticSeq     | 0.937 | 0.923 | 0.875 | 0.832 | 0.947       | 0.936           | 0.917       | 0.903           | 0.721       | 0.684           |

TABLE 10. Sensitivity of a simple consensus approach. M: MuTect. V: VarScan2. J: JointSNVMix2. S: SomaticSniper. D: VarDict with relaxed filters. MJ represent all calls intersected by MuTect (M) and JointSNVMix2 (J). The first four columns represent the four DREAM Challenge Stage 3 (DC3) settings. The last six columns represent the six *in silico* titration settings. The subscripts denote the expected VAF (%) of the Normal (N) and Tumor (T).

| Consensus  | DC3A  | DC3B  | DC3C  | DC3D  | N <sub>0</sub> T <sub>50</sub> | N <sub>2.5</sub> T <sub>50</sub> | N <sub>0</sub> T <sub>25</sub> | N <sub>2.5</sub> T <sub>25</sub> | N <sub>0</sub> T <sub>15</sub> | N <sub>2.5</sub> T <sub>15</sub> |
|------------|-------|-------|-------|-------|--------------------------------|----------------------------------|--------------------------------|----------------------------------|--------------------------------|----------------------------------|
| MV         | 0.905 | 0.875 | 0.869 | 0.821 | 0.539                          | 0.464                            | 0.413                          | 0.327                            | 0.082                          | 0.038                            |
| MJ         | 0.896 | 0.869 | 0.868 | 0.828 | 0.423                          | 0.353                            | 0.410                          | 0.337                            | 0.322                          | 0.240                            |
| MS         | 0.933 | 0.914 | 0.907 | 0.873 | 0.491                          | 0.416                            | 0.430                          | 0.349                            | 0.173                          | 0.104                            |
| MD         | 0.889 | 0.860 | 0.877 | 0.840 | 0.360                          | 0.289                            | 0.352                          | 0.280                            | 0.308                          | 0.212                            |
| VJ         | 0.661 | 0.640 | 0.578 | 0.546 | 0.208                          | 0.198                            | 0.137                          | 0.126                            | 0.020                          | 0.015                            |
| VS         | 0.659 | 0.649 | 0.571 | 0.552 | 0.259                          | 0.257                            | 0.174                          | 0.172                            | 0.026                          | 0.023                            |
| VD         | 0.929 | 0.914 | 0.902 | 0.875 | 0.534                          | 0.459                            | 0.410                          | 0.324                            | 0.081                          | 0.037                            |
| JS         | 0.685 | 0.669 | 0.603 | 0.582 | 0.242                          | 0.232                            | 0.202                          | 0.189                            | 0.065                          | 0.055                            |
| JD         | 0.931 | 0.919 | 0.912 | 0.893 | 0.437                          | 0.365                            | 0.428                          | 0.353                            | 0.343                          | 0.250                            |
| SD         | 0.946 | 0.936 | 0.924 | 0.906 | 0.468                          | 0.394                            | 0.410                          | 0.330                            | 0.161                          | 0.095                            |
| MVJ        | 0.928 | 0.905 | 0.900 | 0.861 | 0.541                          | 0.467                            | 0.415                          | 0.329                            | 0.083                          | 0.038                            |
| MVS        | 0.952 | 0.936 | 0.931 | 0.902 | 0.571                          | 0.496                            | 0.444                          | 0.355                            | 0.091                          | 0.042                            |
| MVD        | 0.987 | 0.982 | 0.981 | 0.973 | 0.693                          | 0.620                            | 0.577                          | 0.476                            | 0.147                          | 0.067                            |
| MJS        | 0.935 | 0.916 | 0.910 | 0.876 | 0.523                          | 0.449                            | 0.462                          | 0.379                            | 0.192                          | 0.117                            |
| MJD        | 0.983 | 0.979 | 0.979 | 0.971 | 0.597                          | 0.516                            | 0.584                          | 0.498                            | 0.488                          | 0.371                            |
| MSD        | 0.990 | 0.987 | 0.986 | 0.980 | 0.601                          | 0.521                            | 0.542                          | 0.448                            | 0.247                          | 0.148                            |
| VJS        | 0.772 | 0.756 | 0.700 | 0.674 | 0.273                          | 0.261                            | 0.185                          | 0.171                            | 0.028                          | 0.021                            |
| VJD        | 0.958 | 0.948 | 0.941 | 0.923 | 0.539                          | 0.464                            | 0.415                          | 0.327                            | 0.082                          | 0.037                            |
| VSD        | 0.962 | 0.954 | 0.946 | 0.930 | 0.558                          | 0.484                            | 0.433                          | 0.345                            | 0.087                          | 0.040                            |
| JSD        | 0.964 | 0.957 | 0.949 | 0.936 | 0.507                          | 0.433                            | 0.449                          | 0.366                            | 0.184                          | 0.110                            |
| MVJS       | 0.953 | 0.937 | 0.933 | 0.904 | 0.572                          | 0.497                            | 0.445                          | 0.356                            | 0.092                          | 0.042                            |
| MVJD       | 0.989 | 0.984 | 0.984 | 0.976 | 0.695                          | 0.622                            | 0.579                          | 0.478                            | 0.148                          | 0.067                            |
| MVSD       | 0.992 | 0.989 | 0.989 | 0.983 | 0.707                          | 0.635                            | 0.592                          | 0.492                            | 0.154                          | 0.070                            |
| MJSD       | 0.991 | 0.988 | 0.987 | 0.981 | 0.650                          | 0.572                            | 0.593                          | 0.500                            | 0.287                          | 0.176                            |
| VJSD       | 0.970 | 0.963 | 0.957 | 0.944 | 0.560                          | 0.486                            | 0.435                          | 0.347                            | 0.088                          | 0.040                            |
| MVJSD      | 0.992 | 0.990 | 0.989 | 0.984 | 0.708                          | 0.636                            | 0.593                          | 0.493                            | 0.154                          | 0.070                            |
| ≥ 2 tools  | 0.522 | 0.511 | 0.495 | 0.471 | 0.141                          | 0.140                            | 0.139                          | 0.134                            | 0.119                          | 0.091                            |
| ≥ 3 tools  | 0.774 | 0.759 | 0.725 | 0.701 | 0.235                          | 0.224                            | 0.226                          | 0.202                            | 0.163                          | 0.115                            |
| ≥ 4 tools  | 0.938 | 0.925 | 0.914 | 0.891 | 0.440                          | 0.375                            | 0.382                          | 0.308                            | 0.146                          | 0.085                            |
| 5 tools    | 0.992 | 0.990 | 0.989 | 0.984 | 0.708                          | 0.636                            | 0.593                          | 0.493                            | 0.154                          | 0.070                            |
| SomaticSeq | 0.992 | 0.997 | 0.996 | 0.994 | 0.963                          | 0.969                            | 0.978                          | 0.985                            | 0.959                          | 0.978                            |

TABLE 11. Precision of simple consensus approach. M: MuTect. V: VarScan2. J: JointSNVMix2. S: SomaticSniper. D: VarDict with relaxed filters. MJ represent all calls intersected by MuTect (M) and JointSNVMix2 (J). The first four columns represent the four DREAM Challenge Stage 3 (DC3) settings. The last six columns represent the six *in silico* titration settings. The subscripts denote the expected VAF (%) of the Normal (N) and Tumor (T).

| Consensus      | CLL1   |         | COLO829 |         |
|----------------|--------|---------|---------|---------|
|                | Recall | # Calls | Recall  | # Calls |
| MV             | 0.865  | 2,323   | 0.985   | 37,106  |
| MJ             | 0.883  | 3,363   | 0.993   | 39,898  |
| MS             | 0.888  | 2,503   | 0.993   | 37,495  |
| MD             | 0.877  | 3,669   | 0.866   | 38,059  |
| VJ             | 0.866  | 5,386   | 0.987   | 43,963  |
| VS             | 0.880  | 6,872   | 0.987   | 45,072  |
| VD             | 0.854  | 2,731   | 0.859   | 35,900  |
| JS             | 0.889  | 7,061   | 0.996   | 44,313  |
| JD             | 0.872  | 3,444   | 0.868   | 38,034  |
| SD             | 0.874  | 2,821   | 0.868   | 36,102  |
| MVJ            | 0.855  | 2,149   | 0.985   | 36,851  |
| MVS            | 0.864  | 2,098   | 0.985   | 36,619  |
| MVD            | 0.849  | 1,845   | 0.857   | 34,327  |
| MJS            | 0.877  | 2,416   | 0.993   | 37,376  |
| MJD            | 0.868  | 2,230   | 0.866   | 35,751  |
| MSD            | 0.871  | 1,952   | 0.866   | 34,740  |
| VJS            | 0.865  | 4,470   | 0.987   | 41,038  |
| VJD            | 0.846  | 2,271   | 0.859   | 35,331  |
| VSD            | 0.851  | 2,327   | 0.859   | 35,180  |
| JSD            | 0.866  | 2,483   | 0.868   | 35,799  |
| MVJS           | 0.855  | 2,042   | 0.985   | 36,537  |
| MVJD           | 0.842  | 1,782   | 0.857   | 34,223  |
| MVSD           | 0.848  | 1,779   | 0.857   | 34,139  |
| MJSD           | 0.863  | 1,913   | 0.866   | 34,673  |
| VJSD           | 0.845  | 2,117   | 0.859   | 34,988  |
| MVJSD          | 0.842  | 1,749   | 0.857   | 34,086  |
| $\geq 2$ tools | 0.916  | 13,594  | 0.996   | 57,254  |
| $\geq 3$ tools | 0.904  | 5,836   | 0.996   | 43,848  |
| $\geq 4$ tools | 0.886  | 2,637   | 0.996   | 38,216  |
| 5 tools        | 0.842  | 1,749   | 0.857   | 34,086  |
| SomaticSeq     | 0.892  | 2,320   | 0.996   | 37,452  |

TABLE 12. Sensitivity and call set size of prediction of CLL1 (chronic lymphocytic leukemia) and COLO829 (melanoma) based on a simple consensus.

| SNV   | DC3A  | DC3B  | DC3C  | DC3D  | N <sub>0</sub> T <sub>50</sub> | N <sub>2.5</sub> T <sub>50</sub> | N <sub>0</sub> T <sub>25</sub> | N <sub>2.5</sub> T <sub>25</sub> | N <sub>0</sub> T <sub>15</sub> | N <sub>2.5</sub> T <sub>15</sub> |
|-------|-------|-------|-------|-------|--------------------------------|----------------------------------|--------------------------------|----------------------------------|--------------------------------|----------------------------------|
| M     | 0.951 | 0.827 | 0.899 | 0.760 | 0.928                          | 0.790                            | 0.887                          | 0.738                            | 0.722                          | 0.569                            |
| V     | 0.811 | 0.792 | 0.649 | 0.612 | 0.922                          | 0.938                            | 0.699                          | 0.693                            | 0.096                          | 0.098                            |
| J     | 0.937 | 0.895 | 0.801 | 0.760 | 0.932                          | 0.915                            | 0.907                          | 0.882                            | 0.729                          | 0.700                            |
| S     | 0.867 | 0.850 | 0.694 | 0.680 | 0.931                          | 0.940                            | 0.836                          | 0.848                            | 0.319                          | 0.325                            |
| D     | 0.954 | 0.886 | 0.918 | 0.809 | 0.941                          | 0.794                            | 0.925                          | 0.769                            | 0.814                          | 0.583                            |
| MV    | 0.950 | 0.921 | 0.900 | 0.840 | 0.939                          | 0.945                            | 0.905                          | 0.866                            | 0.716                          | 0.612                            |
| MJ    | 0.958 | 0.920 | 0.903 | 0.851 | 0.931                          | 0.914                            | 0.906                          | 0.879                            | 0.768                          | 0.747                            |
| MS    | 0.952 | 0.928 | 0.898 | 0.860 | 0.941                          | 0.941                            | 0.903                          | 0.902                            | 0.724                          | 0.662                            |
| MD    | 0.964 | 0.890 | 0.933 | 0.843 | 0.948                          | 0.813                            | 0.927                          | 0.793                            | 0.807                          | 0.649                            |
| VJ    | 0.935 | 0.915 | 0.804 | 0.777 | 0.937                          | 0.936                            | 0.906                          | 0.902                            | 0.745                          | 0.718                            |
| VS    | 0.880 | 0.865 | 0.713 | 0.701 | 0.941                          | 0.944                            | 0.844                          | 0.845                            | 0.335                          | 0.328                            |
| VD    | 0.953 | 0.943 | 0.921 | 0.869 | 0.950                          | 0.946                            | 0.927                          | 0.900                            | 0.813                          | 0.615                            |
| JS    | 0.935 | 0.920 | 0.805 | 0.784 | 0.935                          | 0.944                            | 0.919                          | 0.917                            | 0.753                          | 0.732                            |
| JD    | 0.956 | 0.939 | 0.916 | 0.870 | 0.942                          | 0.917                            | 0.943                          | 0.913                            | 0.819                          | 0.759                            |
| SD    | 0.956 | 0.947 | 0.915 | 0.875 | 0.947                          | 0.947                            | 0.939                          | 0.928                            | 0.804                          | 0.679                            |
| MVJ   | 0.956 | 0.931 | 0.900 | 0.864 | 0.945                          | 0.947                            | 0.926                          | 0.915                            | 0.779                          | 0.760                            |
| MVS   | 0.951 | 0.931 | 0.900 | 0.858 | 0.950                          | 0.950                            | 0.901                          | 0.902                            | 0.721                          | 0.658                            |
| MVD   | 0.962 | 0.950 | 0.932 | 0.890 | 0.952                          | 0.955                            | 0.929                          | 0.901                            | 0.809                          | 0.686                            |
| MJS   | 0.958 | 0.936 | 0.903 | 0.867 | 0.937                          | 0.944                            | 0.928                          | 0.915                            | 0.778                          | 0.775                            |
| MJD   | 0.960 | 0.941 | 0.931 | 0.891 | 0.951                          | 0.931                            | 0.940                          | 0.916                            | 0.829                          | 0.783                            |
| MSD   | 0.963 | 0.947 | 0.931 | 0.898 | 0.951                          | 0.955                            | 0.934                          | 0.923                            | 0.808                          | 0.716                            |
| VJS   | 0.939 | 0.923 | 0.805 | 0.789 | 0.933                          | 0.949                            | 0.927                          | 0.927                            | 0.757                          | 0.738                            |
| VJD   | 0.956 | 0.951 | 0.923 | 0.884 | 0.951                          | 0.952                            | 0.942                          | 0.937                            | 0.822                          | 0.769                            |
| VSD   | 0.955 | 0.950 | 0.918 | 0.875 | 0.950                          | 0.955                            | 0.937                          | 0.925                            | 0.818                          | 0.668                            |
| JSD   | 0.957 | 0.951 | 0.921 | 0.885 | 0.945                          | 0.948                            | 0.938                          | 0.950                            | 0.819                          | 0.780                            |
| MVJS  | 0.958 | 0.938 | 0.899 | 0.869 | 0.943                          | 0.947                            | 0.929                          | 0.932                            | 0.781                          | 0.781                            |
| MVJD  | 0.963 | 0.955 | 0.931 | 0.901 | 0.948                          | 0.958                            | 0.937                          | 0.934                            | 0.824                          | 0.793                            |
| MVSD  | 0.964 | 0.958 | 0.931 | 0.899 | 0.949                          | 0.955                            | 0.929                          | 0.932                            | 0.810                          | 0.724                            |
| MJSD  | 0.962 | 0.952 | 0.927 | 0.902 | 0.950                          | 0.952                            | 0.942                          | 0.947                            | 0.825                          | 0.807                            |
| VJSD  | 0.956 | 0.957 | 0.920 | 0.885 | 0.947                          | 0.957                            | 0.946                          | 0.944                            | 0.826                          | 0.778                            |
| MVJSD | 0.964 | 0.958 | 0.932 | 0.905 | 0.955                          | 0.952                            | 0.946                          | 0.942                            | 0.823                          | 0.805                            |
| INDEL |       |       |       |       |                                |                                  |                                |                                  |                                |                                  |
| M     | 0.266 | 0.135 | 0.048 | 0.013 | 0.831                          | 0.393                            | 0.051                          | 0.002                            | 0.000                          | 0.000                            |
| V     | 0.489 | 0.472 | 0.279 | 0.268 | 0.906                          | 0.897                            | 0.517                          | 0.520                            | 0.052                          | 0.045                            |
| D     | 0.877 | 0.833 | 0.852 | 0.762 | 0.834                          | 0.697                            | 0.830                          | 0.681                            | 0.737                          | 0.532                            |
| MV    | 0.506 | 0.487 | 0.284 | 0.264 | 0.908                          | 0.901                            | 0.509                          | 0.519                            | 0.739                          | 0.046                            |
| MD    | 0.878 | 0.834 | 0.852 | 0.760 | 0.857                          | 0.711                            | 0.834                          | 0.680                            | 0.748                          | 0.533                            |
| VD    | 0.875 | 0.869 | 0.848 | 0.786 | 0.910                          | 0.891                            | 0.850                          | 0.793                            | 0.738                          | 0.556                            |
| MVD   | 0.874 | 0.868 | 0.855 | 0.788 | 0.912                          | 0.910                            | 0.844                          | 0.793                            | 0.786                          | 0.562                            |

TABLE 13. F1 scores of every possible combination of individual callers, followed by the same machine learning algorithm. M: MuTect/Indelocator. V: VarScan2. J: JointSNVMix2. S: SomaticSniper. D: VarDict with relaxed filters. MJ represent all calls intersected by MuTect (M) and JointSNVMix2 (J). The first four columns represent the four DREAM Challenge Stage 3 (DC3) settings. The last six columns represent the six *in silico* titration settings. The subscripts denote the expected VAF (%) of the Normal (N) and Tumor (T).

| SNV   | DC3A  | DC3B  | DC3C  | DC3D  | $N_0T_{50}$ | $N_{2.5}T_{50}$ | $N_0T_{25}$ | $N_{2.5}T_{25}$ | $N_0T_{15}$ | $N_{2.5}T_{15}$ |
|-------|-------|-------|-------|-------|-------------|-----------------|-------------|-----------------|-------------|-----------------|
| M     | 0.917 | 0.714 | 0.835 | 0.626 | 0.913       | 0.676           | 0.834       | 0.605           | 0.606       | 0.412           |
| V     | 0.689 | 0.664 | 0.484 | 0.445 | 0.911       | 0.927           | 0.558       | 0.544           | 0.051       | 0.052           |
| J     | 0.889 | 0.818 | 0.674 | 0.620 | 0.911       | 0.873           | 0.870       | 0.820           | 0.594       | 0.551           |
| S     | 0.770 | 0.744 | 0.534 | 0.517 | 0.911       | 0.920           | 0.737       | 0.749           | 0.191       | 0.195           |
| D     | 0.918 | 0.795 | 0.849 | 0.680 | 0.928       | 0.681           | 0.889       | 0.636           | 0.717       | 0.420           |
| MV    | 0.918 | 0.869 | 0.834 | 0.742 | 0.918       | 0.930           | 0.858       | 0.785           | 0.598       | 0.457           |
| MJ    | 0.930 | 0.862 | 0.839 | 0.758 | 0.914       | 0.873           | 0.869       | 0.813           | 0.652       | 0.616           |
| MS    | 0.922 | 0.877 | 0.832 | 0.772 | 0.925       | 0.921           | 0.848       | 0.840           | 0.603       | 0.513           |
| MD    | 0.938 | 0.804 | 0.877 | 0.730 | 0.935       | 0.704           | 0.893       | 0.668           | 0.710       | 0.490           |
| VJ    | 0.887 | 0.857 | 0.679 | 0.644 | 0.921       | 0.917           | 0.872       | 0.857           | 0.609       | 0.574           |
| VS    | 0.792 | 0.772 | 0.559 | 0.543 | 0.933       | 0.926           | 0.744       | 0.743           | 0.202       | 0.197           |
| VD    | 0.916 | 0.894 | 0.854 | 0.770 | 0.941       | 0.929           | 0.888       | 0.830           | 0.715       | 0.452           |
| JS    | 0.887 | 0.862 | 0.680 | 0.652 | 0.925       | 0.927           | 0.879       | 0.869           | 0.618       | 0.589           |
| JD    | 0.922 | 0.886 | 0.846 | 0.772 | 0.926       | 0.872           | 0.913       | 0.854           | 0.716       | 0.621           |
| SD    | 0.923 | 0.901 | 0.843 | 0.780 | 0.937       | 0.926           | 0.904       | 0.877           | 0.703       | 0.524           |
| MVJ   | 0.926 | 0.884 | 0.834 | 0.778 | 0.933       | 0.932           | 0.893       | 0.871           | 0.665       | 0.629           |
| MVS   | 0.919 | 0.885 | 0.835 | 0.769 | 0.942       | 0.934           | 0.843       | 0.840           | 0.605       | 0.510           |
| MVD   | 0.934 | 0.908 | 0.876 | 0.805 | 0.943       | 0.941           | 0.893       | 0.833           | 0.712       | 0.534           |
| MJS   | 0.930 | 0.889 | 0.842 | 0.783 | 0.921       | 0.922           | 0.892       | 0.862           | 0.661       | 0.649           |
| MJD   | 0.930 | 0.890 | 0.875 | 0.807 | 0.940       | 0.895           | 0.909       | 0.855           | 0.732       | 0.651           |
| MSD   | 0.935 | 0.901 | 0.874 | 0.819 | 0.939       | 0.938           | 0.896       | 0.872           | 0.709       | 0.571           |
| VJS   | 0.895 | 0.870 | 0.680 | 0.659 | 0.918       | 0.936           | 0.891       | 0.884           | 0.622       | 0.594           |
| VJD   | 0.922 | 0.909 | 0.858 | 0.794 | 0.942       | 0.939           | 0.911       | 0.895           | 0.720       | 0.633           |
| VSD   | 0.920 | 0.908 | 0.849 | 0.779 | 0.938       | 0.943           | 0.903       | 0.875           | 0.726       | 0.513           |
| JSD   | 0.924 | 0.909 | 0.854 | 0.795 | 0.930       | 0.928           | 0.899       | 0.917           | 0.717       | 0.648           |
| MVJS  | 0.931 | 0.896 | 0.831 | 0.787 | 0.930       | 0.931           | 0.890       | 0.891           | 0.666       | 0.655           |
| MVJD  | 0.935 | 0.916 | 0.874 | 0.824 | 0.932       | 0.945           | 0.903       | 0.891           | 0.725       | 0.667           |
| MVSD  | 0.938 | 0.922 | 0.874 | 0.820 | 0.938       | 0.939           | 0.886       | 0.884           | 0.712       | 0.580           |
| MJSD  | 0.934 | 0.910 | 0.868 | 0.825 | 0.940       | 0.932           | 0.906       | 0.915           | 0.725       | 0.685           |
| VJSD  | 0.922 | 0.920 | 0.852 | 0.796 | 0.939       | 0.946           | 0.914       | 0.904           | 0.727       | 0.644           |
| MVJSD | 0.937 | 0.923 | 0.875 | 0.832 | 0.947       | 0.936           | 0.917       | 0.903           | 0.721       | 0.684           |
| INDEL |       |       |       |       |             |                 |             |                 |             |                 |
| M     | 0.156 | 0.073 | 0.025 | 0.007 | 0.766       | 0.261           | 0.026       | 0.001           | 0.000       | 0.000           |
| V     | 0.334 | 0.318 | 0.165 | 0.157 | 0.861       | 0.845           | 0.354       | 0.356           | 0.027       | 0.023           |
| D     | 0.814 | 0.722 | 0.750 | 0.622 | 0.775       | 0.563           | 0.735       | 0.529           | 0.610       | 0.370           |
| MV    | 0.350 | 0.330 | 0.168 | 0.154 | 0.861       | 0.850           | 0.348       | 0.356           | 0.610       | 0.024           |
| MD    | 0.815 | 0.723 | 0.751 | 0.619 | 0.788       | 0.570           | 0.741       | 0.528           | 0.619       | 0.372           |
| VD    | 0.809 | 0.777 | 0.744 | 0.655 | 0.860       | 0.837           | 0.756       | 0.668           | 0.609       | 0.393           |
| MVD   | 0.807 | 0.776 | 0.754 | 0.656 | 0.864       | 0.864           | 0.747       | 0.668           | 0.688       | 0.399           |

TABLE 14. Recalls of every possible combination of individual callers, followed by the same machine learning algorithm. M: MuTect/Indelocator. V: VarScan2. J: JointSNVMix2. S: SomaticSniper. D: VarDict with relaxed filters. MJ represent all calls intersected by MuTect (M) and JointSNVMix2 (J). The first four columns represent the four DREAM Challenge Stage 3 (DC3) settings. The last six columns represent the six *in silico* titration settings. The subscripts denote the expected VAF (%) of the Normal (N) and Tumor (T).

| SNV   | DC3A  | DC3B  | DC3C  | DC3D  | N <sub>0</sub> T <sub>50</sub> | N <sub>2.5</sub> T <sub>50</sub> | N <sub>0</sub> T <sub>25</sub> | N <sub>2.5</sub> T <sub>25</sub> | N <sub>0</sub> T <sub>15</sub> | N <sub>2.5</sub> T <sub>15</sub> |
|-------|-------|-------|-------|-------|--------------------------------|----------------------------------|--------------------------------|----------------------------------|--------------------------------|----------------------------------|
| M     | 0.987 | 0.983 | 0.974 | 0.966 | 0.943                          | 0.949                            | 0.948                          | 0.946                            | 0.894                          | 0.919                            |
| V     | 0.986 | 0.982 | 0.985 | 0.982 | 0.932                          | 0.950                            | 0.937                          | 0.954                            | 0.873                          | 0.911                            |
| J     | 0.990 | 0.988 | 0.985 | 0.982 | 0.953                          | 0.962                            | 0.948                          | 0.955                            | 0.942                          | 0.961                            |
| S     | 0.992 | 0.991 | 0.992 | 0.990 | 0.951                          | 0.960                            | 0.967                          | 0.978                            | 0.975                          | 0.978                            |
| D     | 0.993 | 0.999 | 1.000 | 0.999 | 0.953                          | 0.952                            | 0.964                          | 0.972                            | 0.941                          | 0.954                            |
| MV    | 0.986 | 0.980 | 0.977 | 0.968 | 0.961                          | 0.961                            | 0.958                          | 0.966                            | 0.894                          | 0.929                            |
| MJ    | 0.987 | 0.985 | 0.977 | 0.971 | 0.949                          | 0.959                            | 0.947                          | 0.957                            | 0.935                          | 0.951                            |
| MS    | 0.985 | 0.986 | 0.975 | 0.970 | 0.958                          | 0.963                            | 0.966                          | 0.973                            | 0.906                          | 0.934                            |
| MD    | 0.992 | 0.998 | 0.995 | 0.997 | 0.961                          | 0.962                            | 0.965                          | 0.976                            | 0.936                          | 0.960                            |
| VJ    | 0.988 | 0.982 | 0.984 | 0.980 | 0.953                          | 0.957                            | 0.943                          | 0.952                            | 0.958                          | 0.960                            |
| VS    | 0.989 | 0.985 | 0.987 | 0.986 | 0.950                          | 0.963                            | 0.975                          | 0.980                            | 0.982                          | 0.985                            |
| VD    | 0.993 | 0.998 | 0.999 | 0.998 | 0.959                          | 0.963                            | 0.969                          | 0.983                            | 0.941                          | 0.964                            |
| JS    | 0.988 | 0.987 | 0.986 | 0.984 | 0.946                          | 0.962                            | 0.962                          | 0.971                            | 0.962                          | 0.969                            |
| JD    | 0.992 | 0.998 | 0.999 | 0.997 | 0.959                          | 0.966                            | 0.974                          | 0.981                            | 0.957                          | 0.978                            |
| SD    | 0.992 | 0.998 | 1.000 | 0.998 | 0.957                          | 0.970                            | 0.977                          | 0.986                            | 0.940                          | 0.965                            |
| MVJ   | 0.987 | 0.983 | 0.976 | 0.971 | 0.957                          | 0.963                            | 0.962                          | 0.965                            | 0.941                          | 0.961                            |
| MVS   | 0.986 | 0.982 | 0.976 | 0.971 | 0.957                          | 0.967                            | 0.967                          | 0.974                            | 0.892                          | 0.930                            |
| MVD   | 0.991 | 0.996 | 0.995 | 0.996 | 0.962                          | 0.970                            | 0.969                          | 0.981                            | 0.937                          | 0.960                            |
| MJS   | 0.988 | 0.987 | 0.975 | 0.970 | 0.953                          | 0.967                            | 0.968                          | 0.976                            | 0.945                          | 0.963                            |
| MJD   | 0.993 | 0.997 | 0.996 | 0.994 | 0.962                          | 0.970                            | 0.973                          | 0.987                            | 0.956                          | 0.981                            |
| MSD   | 0.992 | 0.997 | 0.995 | 0.994 | 0.963                          | 0.973                            | 0.977                          | 0.982                            | 0.939                          | 0.961                            |
| VJS   | 0.987 | 0.984 | 0.984 | 0.983 | 0.947                          | 0.962                            | 0.966                          | 0.976                            | 0.968                          | 0.974                            |
| VJD   | 0.992 | 0.997 | 0.999 | 0.996 | 0.961                          | 0.967                            | 0.976                          | 0.983                            | 0.959                          | 0.979                            |
| VSD   | 0.992 | 0.997 | 0.999 | 0.997 | 0.961                          | 0.968                            | 0.974                          | 0.982                            | 0.939                          | 0.960                            |
| JSD   | 0.993 | 0.997 | 0.999 | 0.996 | 0.960                          | 0.970                            | 0.981                          | 0.985                            | 0.956                          | 0.980                            |
| MVJS  | 0.987 | 0.985 | 0.978 | 0.970 | 0.956                          | 0.964                            | 0.973                          | 0.977                            | 0.944                          | 0.967                            |
| MVJD  | 0.993 | 0.996 | 0.996 | 0.995 | 0.964                          | 0.973                            | 0.975                          | 0.981                            | 0.955                          | 0.978                            |
| MVSD  | 0.992 | 0.996 | 0.995 | 0.995 | 0.962                          | 0.971                            | 0.976                          | 0.985                            | 0.938                          | 0.962                            |
| MJSD  | 0.992 | 0.997 | 0.995 | 0.994 | 0.960                          | 0.973                            | 0.982                          | 0.982                            | 0.957                          | 0.982                            |
| VJSD  | 0.993 | 0.997 | 0.999 | 0.997 | 0.956                          | 0.970                            | 0.981                          | 0.987                            | 0.956                          | 0.984                            |
| MVJSD | 0.992 | 0.997 | 0.996 | 0.994 | 0.963                          | 0.969                            | 0.978                          | 0.985                            | 0.959                          | 0.978                            |
| INDEL |       |       |       |       |                                |                                  |                                |                                  |                                |                                  |
| M     | 0.906 | 0.857 | 0.834 | 0.674 | 0.908                          | 0.801                            | 0.838                          | 0.964                            | -                              | -                                |
| V     | 0.917 | 0.913 | 0.903 | 0.912 | 0.955                          | 0.957                            | 0.957                          | 0.955                            | 0.930                          | 0.924                            |
| D     | 0.951 | 0.984 | 0.986 | 0.984 | 0.904                          | 0.914                            | 0.955                          | 0.957                            | 0.933                          | 0.950                            |
| MV    | 0.915 | 0.922 | 0.902 | 0.906 | 0.960                          | 0.959                            | 0.949                          | 0.956                            | 0.939                          | 0.937                            |
| MD    | 0.953 | 0.986 | 0.986 | 0.986 | 0.941                          | 0.944                            | 0.955                          | 0.974                            | 0.944                          | 0.939                            |
| VD    | 0.954 | 0.985 | 0.985 | 0.983 | 0.967                          | 0.951                            | 0.971                          | 0.977                            | 0.936                          | 0.950                            |
| MVD   | 0.952 | 0.985 | 0.986 | 0.985 | 0.966                          | 0.961                            | 0.971                          | 0.940                            | 0.917                          | 0.951                            |

TABLE 15. Precisions of every possible combination of individual callers, followed by the same machine learning algorithm. M: MuTect/Indelocator. V: VarScan2. J: JointSNVMix2. S: SomaticSniper. D: VarDict with relaxed filters. MJ represent all calls intersected by MuTect (M) and JointSNVMix2 (J). The first four columns represent the four DREAM Challenge Stage 3 (DC3) settings. The last six columns represent the six *in silico* titration settings. The subscripts denote the expected VAF (%) of the Normal (N) and Tumor (T).

| SNV    | DC3A    | DC3B    | DC3C    | DC3D    | $N_0T_{50}$ | $N_{2.5}T_{50}$ | $N_0T_{25}$ | $N_{2.5}T_{25}$ | $N_0T_{15}$ | $N_{2.5}T_{15}$ |
|--------|---------|---------|---------|---------|-------------|-----------------|-------------|-----------------|-------------|-----------------|
| M      | 0.99800 | 0.99795 | 0.99633 | 0.99631 | 0.99643     | 0.99762         | 0.99701     | 0.99776         | 0.99533     | 0.99763         |
| V      | 0.99840 | 0.99800 | 0.99880 | 0.99861 | 0.99569     | 0.99680         | 0.99757     | 0.99829         | 0.99952     | 0.99967         |
| J      | 0.99852 | 0.99840 | 0.99834 | 0.99814 | 0.99709     | 0.99775         | 0.99689     | 0.99747         | 0.99760     | 0.99853         |
| S      | 0.99897 | 0.99886 | 0.99928 | 0.99917 | 0.99695     | 0.99751         | 0.99836     | 0.99892         | 0.99968     | 0.99971         |
| D      | 0.99891 | 0.99991 | 0.99994 | 0.99994 | 0.99704     | 0.99777         | 0.99783     | 0.99882         | 0.99705     | 0.99869         |
| MV     | 0.99780 | 0.99703 | 0.99673 | 0.99588 | 0.99758     | 0.99756         | 0.99758     | 0.99820         | 0.99540     | 0.99771         |
| MJ     | 0.99801 | 0.99781 | 0.99675 | 0.99632 | 0.99678     | 0.99755         | 0.99685     | 0.99763         | 0.99705     | 0.99795         |
| MS     | 0.99772 | 0.99791 | 0.99641 | 0.99609 | 0.99735     | 0.99767         | 0.99805     | 0.99849         | 0.99594     | 0.99764         |
| MD     | 0.99882 | 0.99967 | 0.99932 | 0.99960 | 0.99753     | 0.99820         | 0.99789     | 0.99894         | 0.99684     | 0.99867         |
| VJ     | 0.99815 | 0.99744 | 0.99814 | 0.99778 | 0.99707     | 0.99734         | 0.99658     | 0.99718         | 0.99824     | 0.99844         |
| VS     | 0.99849 | 0.99805 | 0.99882 | 0.99876 | 0.99677     | 0.99766         | 0.99875     | 0.99901         | 0.99975     | 0.99980         |
| VD     | 0.99891 | 0.99963 | 0.99985 | 0.99971 | 0.99735     | 0.99769         | 0.99813     | 0.99905         | 0.99707     | 0.99888         |
| JS     | 0.99827 | 0.99815 | 0.99837 | 0.99828 | 0.99657     | 0.99760         | 0.99771     | 0.99830         | 0.99842     | 0.99878         |
| JD     | 0.99883 | 0.99965 | 0.99989 | 0.99962 | 0.99744     | 0.99802         | 0.99844     | 0.99892         | 0.99790     | 0.99909         |
| SD     | 0.99876 | 0.99975 | 0.99993 | 0.99974 | 0.99724     | 0.99811         | 0.99862     | 0.99917         | 0.99707     | 0.99877         |
| MVJ    | 0.99800 | 0.99745 | 0.99665 | 0.99609 | 0.99726     | 0.99768         | 0.99767     | 0.99795         | 0.99727     | 0.99832         |
| MVS    | 0.99777 | 0.99735 | 0.99655 | 0.99618 | 0.99726     | 0.99790         | 0.99810     | 0.99855         | 0.99526     | 0.99749         |
| MVD    | 0.99866 | 0.99946 | 0.99933 | 0.99943 | 0.99755     | 0.99808         | 0.99812     | 0.99892         | 0.99691     | 0.99855         |
| MJS    | 0.99811 | 0.99805 | 0.99637 | 0.99598 | 0.99707     | 0.99796         | 0.99808     | 0.99863         | 0.99751     | 0.99836         |
| MJD    | 0.99889 | 0.99957 | 0.99934 | 0.99922 | 0.99757     | 0.99818         | 0.99835     | 0.99924         | 0.99778     | 0.99920         |
| MSD    | 0.99877 | 0.99951 | 0.99929 | 0.99924 | 0.99763     | 0.99833         | 0.99861     | 0.99895         | 0.99699     | 0.99850         |
| VJS    | 0.99803 | 0.99758 | 0.99822 | 0.99811 | 0.99667     | 0.99762         | 0.99793     | 0.99855         | 0.99864     | 0.99896         |
| VJD    | 0.99878 | 0.99950 | 0.99989 | 0.99952 | 0.99750     | 0.99790         | 0.99852     | 0.99901         | 0.99798     | 0.99912         |
| VSD    | 0.99876 | 0.99957 | 0.99987 | 0.99956 | 0.99755     | 0.99794         | 0.99840     | 0.99894         | 0.99691     | 0.99861         |
| JSD    | 0.99893 | 0.99952 | 0.99987 | 0.99952 | 0.99746     | 0.99812         | 0.99884     | 0.99911         | 0.99786     | 0.99913         |
| MVJS   | 0.99798 | 0.99770 | 0.99687 | 0.99594 | 0.99721     | 0.99774         | 0.99841     | 0.99864         | 0.99744     | 0.99857         |
| MVJD   | 0.99883 | 0.99943 | 0.99946 | 0.99930 | 0.99775     | 0.99828         | 0.99846     | 0.99890         | 0.99777     | 0.99902         |
| MVSD   | 0.99875 | 0.99945 | 0.99930 | 0.99926 | 0.99757     | 0.99817         | 0.99861     | 0.99912         | 0.99694     | 0.99852         |
| MJSD   | 0.99882 | 0.99951 | 0.99934 | 0.99915 | 0.99747     | 0.99834         | 0.99889     | 0.99893         | 0.99790     | 0.99919         |
| VJSD   | 0.99887 | 0.99952 | 0.99987 | 0.99956 | 0.99721     | 0.99808         | 0.99887     | 0.99921         | 0.99783     | 0.99930         |
| MVJSD  | 0.99882 | 0.99950 | 0.99939 | 0.99916 | 0.99761     | 0.99804         | 0.99868     | 0.99911         | 0.99797     | 0.99898         |
| SSeq-M | 0.06551 | 0.06619 | 0.06608 | 0.06585 | 0.15993     | 0.16036         | 0.16101     | 0.16144         | 0.16029     | 0.16131         |
| SSeq-V | 0.09762 | 0.09829 | 0.09818 | 0.09795 | 0.09185     | 0.09228         | 0.09292     | 0.09335         | 0.09221     | 0.09322         |
| SSeq-J | 0.17924 | 0.17991 | 0.17981 | 0.17957 | 0.35654     | 0.35697         | 0.35762     | 0.35804         | 0.35690     | 0.35792         |
| SSeq-S | 0.02952 | 0.03019 | 0.03009 | 0.02985 | 0.06162     | 0.06205         | 0.06270     | 0.06313         | 0.06198     | 0.06300         |
| SSeq-D | 0.09968 | 0.10035 | 0.10025 | 0.10001 | 0.10473     | 0.10516         | 0.10580     | 0.10623         | 0.10509     | 0.10610         |
| INDEL  |         |         |         |         |             |                 |             |                 |             |                 |
| M      | 0.99490 | 0.99613 | 0.99844 | 0.99899 | 0.99275     | 0.99397         | 0.99953     | 1.00000         | 0.99891     | 0.99891         |
| V      | 0.99055 | 0.99052 | 0.99438 | 0.99521 | 0.99622     | 0.99648         | 0.99851     | 0.99844         | 0.99567     | 0.99982         |
| D      | 0.98688 | 0.99636 | 0.99656 | 0.99681 | 0.99238     | 0.99509         | 0.99678     | 0.99779         | 0.99982     | 0.99819         |
| MV     | 0.98984 | 0.99126 | 0.99421 | 0.99495 | 0.99661     | 0.99662         | 0.99826     | 0.99848         | 0.99627     | 0.99985         |
| MD     | 0.98745 | 0.99666 | 0.99671 | 0.99715 | 0.99539     | 0.99683         | 0.99675     | 0.99870         | 0.99656     | 0.99775         |
| VD     | 0.98766 | 0.99626 | 0.99635 | 0.99648 | 0.99729     | 0.99602         | 0.99786     | 0.99852         | 0.99614     | 0.99805         |
| MVD    | 0.98738 | 0.99634 | 0.99668 | 0.99694 | 0.99718     | 0.99672         | 0.99790     | 0.99603         | 0.99417     | 0.99806         |
| SSeq-M | 0.12844 | 0.13741 | 0.13775 | 0.13801 | 0.03430     | 0.03384         | 0.03502     | 0.03315         | 0.03129     | 0.03518         |
| SSeq-V | 0.10093 | 0.10990 | 0.11024 | 0.11050 | 0.10439     | 0.10393         | 0.10511     | 0.10324         | 0.10138     | 0.10527         |
| SSeq-D | 0.09409 | 0.10305 | 0.10340 | 0.10365 | 0.17622     | 0.17576         | 0.17694     | 0.17507         | 0.17321     | 0.17710         |

TABLE 16. Negative predictive values (NPV) of all combinations of individual callers, followed by SomaticSeq workflow. M: MuTect/Indelocator. V: VarScan2. J: JointSNVMix2. S: SomaticSniper. D: VarDict with relaxed filters. SSeq-M/V/J/S/D are the differences (improvement) in NPV between 5-tool SomaticSeq and individual callers without SomaticSeq. The first four columns represent the four DREAM Challenge Stage 3 (DC3) settings. The last six columns represent the six *in silico* titration settings.

| SNV       | DC3A  |       |       | DC3B  |       |       | DC3C  |       |       | DC3D  |       |       |
|-----------|-------|-------|-------|-------|-------|-------|-------|-------|-------|-------|-------|-------|
| Features  | 5     | 10    | 20    | 5     | 10    | 20    | 5     | 10    | 20    | 5     | 10    | 20    |
| Recall    | 0.843 | 0.915 | 0.926 | 0.798 | 0.855 | 0.923 | 0.727 | 0.830 | 0.865 | 0.663 | 0.740 | 0.817 |
| Precision | 0.933 | 0.977 | 0.989 | 0.929 | 0.969 | 0.990 | 0.936 | 0.976 | 0.991 | 0.909 | 0.961 | 0.988 |
| F1 score  | 0.886 | 0.945 | 0.956 | 0.858 | 0.908 | 0.955 | 0.818 | 0.897 | 0.924 | 0.767 | 0.839 | 0.894 |
| INDEL     |       |       |       |       |       |       |       |       |       |       |       |       |
| Recall    | 0.674 | 0.773 | 0.810 | 0.593 | 0.705 | 0.767 | 0.589 | 0.676 | 0.752 | 0.440 | 0.563 | 0.642 |
| Precision | 0.845 | 0.941 | 0.951 | 0.817 | 0.930 | 0.985 | 0.822 | 0.936 | 0.987 | 0.805 | 0.923 | 0.984 |
| F1 score  | 0.750 | 0.849 | 0.875 | 0.687 | 0.802 | 0.862 | 0.686 | 0.785 | 0.853 | 0.569 | 0.699 | 0.777 |

TABLE 17. Reduced feature set in DREAM Challenge (DC3) cross validations. For easy comparison purposes, the SNV  $F_1$  scores for the full feature set are 0.964, 0.958, 0.932, and 0.905 for DC3A, DC3B, DC3C, and DC3D, respectively. For INDEL  $F_1$  scores, they are 0.874, 0.868, 0.855, and 0.788. (Table 13).

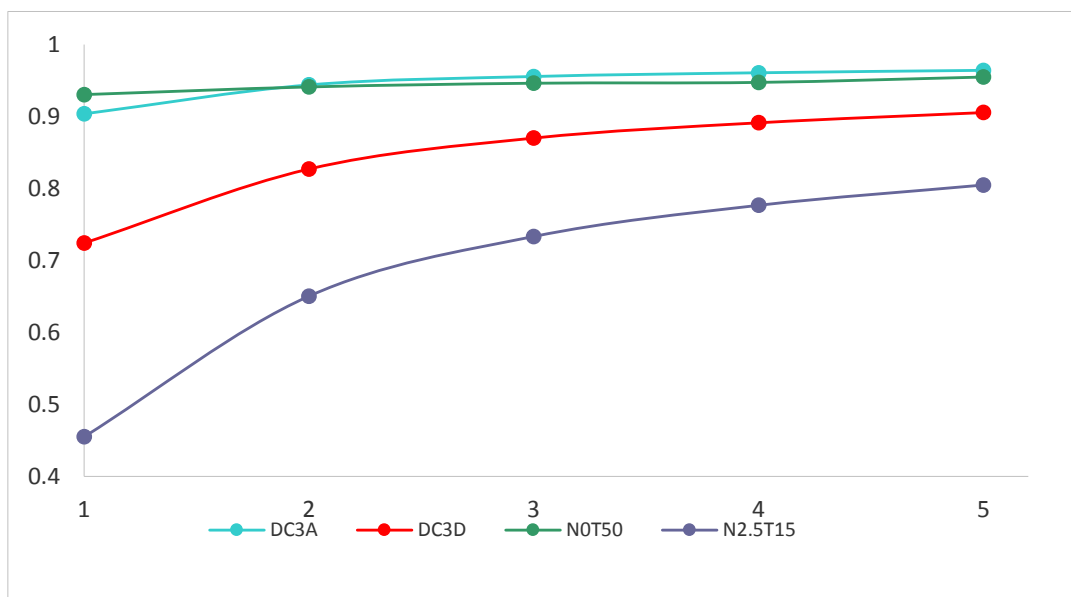

FIGURE 1. The average  $F_1$  scores vs. the number of tools. The gain in accuracy with each addition is the greatest when the data are the most challenging (i.e., DC3D and  $N_{2.5}T_{15}$ ), and the least when the data are the simplest (i.e., DC3A and  $N_0T_{50}$ ). There is also a diminishing return as you add more and more tools.



| SNV            | DC3A                 | DC3B  | DC3C  | DC3D  | $N_0T_{50}$ | $N_{2.5}T_{50}$ | $N_0T_{25}$ | $N_{2.5}T_{25}$ | $N_0T_{15}$ | $N_{2.5}T_{15}$ |
|----------------|----------------------|-------|-------|-------|-------------|-----------------|-------------|-----------------|-------------|-----------------|
| True Positives | F <sub>1</sub> Score |       |       |       |             |                 |             |                 |             |                 |
| 0              | 0.241                | 0.237 | 0.226 | 0.216 | 0.116       | 0.116           | 0.115       | 0.114           | 0.106       | 0.097           |
| 10             | 0.908                | 0.858 | 0.863 | 0.748 | 0.845       | 0.823           | 0.753       | 0.712           | 0.571       | 0.487           |
| 20             | 0.926                | 0.875 | 0.878 | 0.814 | 0.889       | 0.873           | 0.844       | 0.762           | 0.601       | 0.604           |
| 50             | 0.940                | 0.913 | 0.897 | 0.856 | 0.920       | 0.910           | 0.895       | 0.860           | 0.678       | 0.669           |
| 100            | 0.941                | 0.925 | 0.912 | 0.869 | 0.930       | 0.919           | 0.909       | 0.892           | 0.747       | 0.722           |
| 200            | 0.948                | 0.939 | 0.919 | 0.884 | 0.938       | 0.933           | 0.922       | 0.914           | 0.774       | 0.749           |
| 500            | 0.956                | 0.947 | 0.925 | 0.893 | 0.950       | 0.943           | 0.936       | 0.918           | 0.808       | 0.772           |
| 1000           | 0.959                | 0.952 | 0.928 | 0.898 | 0.952       | 0.952           | 0.948       | 0.940           | 0.830       | 0.795           |
| cross validate | 0.964                | 0.958 | 0.932 | 0.905 | 0.955       | 0.952           | 0.946       | 0.942           | 0.823       | 0.805           |
| MuTect         | 0.789                | 0.671 | 0.745 | 0.614 | 0.400       | 0.312           | 0.389       | 0.302           | 0.331       | 0.244           |
| VarScan*       | 0.573                | 0.562 | 0.434 | 0.413 | 0.514       | 0.514           | 0.345       | 0.342           | 0.053       | 0.048           |
| SomaticSniper* | 0.770                | 0.758 | 0.607 | 0.594 | 0.607       | 0.604           | 0.512       | 0.508           | 0.177       | 0.173           |
| JointSNVMix    | 0.558                | 0.530 | 0.459 | 0.431 | 0.189       | 0.179           | 0.184       | 0.172           | 0.133       | 0.121           |
| VarDict        | 0.690                | 0.605 | 0.607 | 0.498 | 0.448       | 0.359           | 0.442       | 0.341           | 0.363       | 0.296           |
|                | Recall               |       |       |       |             |                 |             |                 |             |                 |
| 0              | 0.961                | 0.942 | 0.892 | 0.851 | 1.000       | 1.000           | 0.995       | 0.985           | 0.917       | 0.830           |
| 10             | 0.865                | 0.778 | 0.807 | 0.628 | 0.818       | 0.805           | 0.650       | 0.603           | 0.442       | 0.359           |
| 20             | 0.892                | 0.791 | 0.798 | 0.703 | 0.907       | 0.849           | 0.784       | 0.659           | 0.465       | 0.475           |
| 50             | 0.899                | 0.849 | 0.820 | 0.761 | 0.913       | 0.910           | 0.841       | 0.794           | 0.542       | 0.544           |
| 100            | 0.900                | 0.867 | 0.845 | 0.778 | 0.929       | 0.925           | 0.860       | 0.836           | 0.618       | 0.632           |
| 200            | 0.908                | 0.891 | 0.853 | 0.800 | 0.933       | 0.934           | 0.882       | 0.875           | 0.654       | 0.678           |
| 500            | 0.922                | 0.904 | 0.864 | 0.812 | 0.944       | 0.943           | 0.899       | 0.915           | 0.699       | 0.692           |
| 1000           | 0.927                | 0.912 | 0.868 | 0.821 | 0.944       | 0.936           | 0.920       | 0.898           | 0.733       | 0.703           |
| cross validate | 0.937                | 0.923 | 0.875 | 0.832 | 0.947       | 0.936           | 0.917       | 0.903           | 0.721       | 0.684           |
| 871            | Precision            |       |       |       |             |                 |             |                 |             |                 |
| 0              | 0.138                | 0.135 | 0.129 | 0.124 | 0.061       | 0.061           | 0.061       | 0.060           | 0.056       | 0.051           |
| 10             | 0.955                | 0.956 | 0.926 | 0.925 | 0.874       | 0.842           | 0.893       | 0.867           | 0.807       | 0.756           |
| 20             | 0.962                | 0.978 | 0.977 | 0.968 | 0.871       | 0.899           | 0.913       | 0.902           | 0.851       | 0.829           |
| 50             | 0.985                | 0.989 | 0.991 | 0.979 | 0.926       | 0.910           | 0.956       | 0.937           | 0.905       | 0.867           |
| 100            | 0.986                | 0.992 | 0.991 | 0.984 | 0.932       | 0.912           | 0.963       | 0.957           | 0.942       | 0.840           |
| 200            | 0.992                | 0.993 | 0.995 | 0.988 | 0.944       | 0.932           | 0.967       | 0.957           | 0.949       | 0.837           |
| 500            | 0.993                | 0.994 | 0.996 | 0.991 | 0.956       | 0.943           | 0.977       | 0.922           | 0.957       | 0.873           |
| 1000           | 0.992                | 0.995 | 0.996 | 0.991 | 0.961       | 0.969           | 0.977       | 0.986           | 0.956       | 0.913           |
| cross validate | 0.992                | 0.997 | 0.996 | 0.994 | 0.963       | 0.969           | 0.978       | 0.985           | 0.959       | 0.978           |
| T.P. fraction  | 0.138                | 0.135 | 0.129 | 0.124 | 0.061       | 0.061           | 0.061       | 0.060           | 0.056       | 0.051           |

TABLE 18. Reduced size of training data set for SomaticSeq SNVs. Size is defined by the number of true positives. The final row (T.P. fraction) is the fraction of true positives in the training data for each data set, i.e., for DC3A (DREAM Challenge Stage 3, Setting A), the fraction of true positives is 0.138. Thus, when there are 10 true positives, the total training data consisted of  $10/0.138 = 73$  calls (of which 10 are true positives and 63 are false positives). 0 means no SomaticSeq training. F<sub>1</sub> score of the individual tools are included for easy comparison. \* Author-recommended false positive filters are applied to SomaticSniper and VarScan outputs.

| INDEL          | DC3A                 | DC3B  | DC3C  | DC3D  | $N_0T_{50}$ | $N_{2.5}T_{50}$ | $N_0T_{25}$ | $N_{2.5}T_{25}$ | $N_0T_{15}$ | $N_{2.5}T_{15}$ |
|----------------|----------------------|-------|-------|-------|-------------|-----------------|-------------|-----------------|-------------|-----------------|
| True Positives | F <sub>1</sub> Score |       |       |       |             |                 |             |                 |             |                 |
| 0              | 0.339                | 0.320 | 0.310 | 0.277 | 0.155       | 0.154           | 0.139       | 0.134           | 0.123       | 0.082           |
| 10             | 0.774                | 0.741 | 0.748 | 0.672 | 0.712       | 0.677           | 0.645       | 0.582           | 0.483       | 0.263           |
| 20             | 0.819                | 0.781 | 0.786 | 0.698 | 0.777       | 0.748           | 0.713       | 0.594           | 0.553       | 0.419           |
| 50             | 0.846                | 0.811 | 0.820 | 0.731 | 0.831       | 0.810           | 0.778       | 0.688           | 0.556       | 0.425           |
| 100            | 0.860                | 0.835 | 0.831 | 0.750 | 0.849       | 0.836           | 0.794       | 0.727           | 0.660       | 0.480           |
| 200            | 0.868                | 0.846 | 0.838 | 0.764 | 0.863       | 0.859           | 0.810       | 0.755           | 0.707       | 0.512           |
| 500            | 0.873                | 0.857 | 0.844 | 0.775 | 0.885       | 0.887           | 0.834       | 0.777           | 0.732       | 0.554           |
| 1000           | 0.877                | 0.863 | 0.848 | 0.781 | 0.911       | 0.906           | 0.856       | 0.798           | 0.753       | 0.561           |
| cross validate | 0.874                | 0.868 | 0.855 | 0.788 | 0.912       | 0.910           | 0.844       | 0.793           | 0.786       | 0.562           |
| Indelocator    | 0.202                | 0.110 | 0.048 | 0.023 | 0.729       | 0.382           | 0.064       | 0.017           | 0.001       | 0.000           |
| VarScan        | 0.218                | 0.211 | 0.124 | 0.115 | 0.390       | 0.390           | 0.184       | 0.182           | 0.020       | 0.018           |
| VarDict        | 0.707                | 0.635 | 0.619 | 0.525 | 0.408       | 0.319           | 0.393       | 0.296           | 0.311       | 0.165           |
|                | Recall               |       |       |       |             |                 |             |                 |             |                 |
| 0              | 0.847                | 0.791 | 0.762 | 0.667 | 0.979       | 0.976           | 0.871       | 0.764           | 0.765       | 0.497           |
| 10             | 0.732                | 0.673 | 0.658 | 0.562 | 0.625       | 0.593           | 0.529       | 0.443           | 0.360       | 0.158           |
| 20             | 0.754                | 0.687 | 0.693 | 0.573 | 0.695       | 0.664           | 0.595       | 0.441           | 0.412       | 0.277           |
| 50             | 0.786                | 0.721 | 0.727 | 0.605 | 0.773       | 0.739           | 0.668       | 0.547           | 0.491       | 0.277           |
| 100            | 0.801                | 0.746 | 0.736 | 0.620 | 0.796       | 0.771           | 0.684       | 0.588           | 0.516       | 0.324           |
| 200            | 0.809                | 0.760 | 0.739 | 0.638 | 0.807       | 0.811           | 0.709       | 0.623           | 0.571       | 0.353           |
| 500            | 0.812                | 0.768 | 0.744 | 0.644 | 0.828       | 0.829           | 0.739       | 0.649           | 0.601       | 0.392           |
| 1000           | 0.818                | 0.772 | 0.747 | 0.650 | 0.864       | 0.855           | 0.765       | 0.673           | 0.626       | 0.397           |
| cross validate | 0.807                | 0.776 | 0.754 | 0.656 | 0.864       | 0.864           | 0.747       | 0.668           | 0.688       | 0.399           |
|                | Precision            |       |       |       |             |                 |             |                 |             |                 |
| 0              | 0.212                | 0.201 | 0.195 | 0.175 | 0.084       | 0.084           | 0.075       | 0.067           | 0.067       | 0.044           |
| 10             | 0.822                | 0.824 | 0.866 | 0.834 | 0.828       | 0.788           | 0.826       | 0.848           | 0.734       | 0.788           |
| 20             | 0.895                | 0.904 | 0.908 | 0.893 | 0.881       | 0.857           | 0.890       | 0.912           | 0.841       | 0.857           |
| 50             | 0.915                | 0.928 | 0.940 | 0.924 | 0.898       | 0.895           | 0.931       | 0.927           | 0.907       | 0.910           |
| 100            | 0.927                | 0.947 | 0.956 | 0.950 | 0.909       | 0.913           | 0.946       | 0.953           | 0.916       | 0.927           |
| 200            | 0.936                | 0.955 | 0.969 | 0.953 | 0.928       | 0.913           | 0.945       | 0.956           | 0.928       | 0.934           |
| 500            | 0.944                | 0.969 | 0.974 | 0.973 | 0.952       | 0.954           | 0.957       | 0.967           | 0.935       | 0.946           |
| 1000           | 0.945                | 0.977 | 0.980 | 0.980 | 0.964       | 0.963           | 0.972       | 0.979           | 0.945       | 0.956           |
| cross validate | 0.952                | 0.985 | 0.986 | 0.985 | 0.966       | 0.961           | 0.971       | 0.940           | 0.917       | 0.951           |
| T.P. fraction  | 0.212                | 0.201 | 0.195 | 0.175 | 0.084       | 0.084           | 0.075       | 0.067           | 0.067       | 0.044           |

TABLE 19. Reduced size of training data set for SomaticSeq INDELS. Size is defined by the number of true positives. The final row (T.P. fraction) is the fraction of true positives in the training data for each data set, i.e., for DC3A (DREAM Challenge Stage 3, Setting A), the fraction of true positives is 0.138. Thus, when there are 10 true positives, the total training data consisted of  $10/0.212 = 47$  calls (of which 10 are true positives and 37 are false positives). 0 means no SomaticSeq training. F<sub>1</sub> score of the individual tools are included for easy comparison.

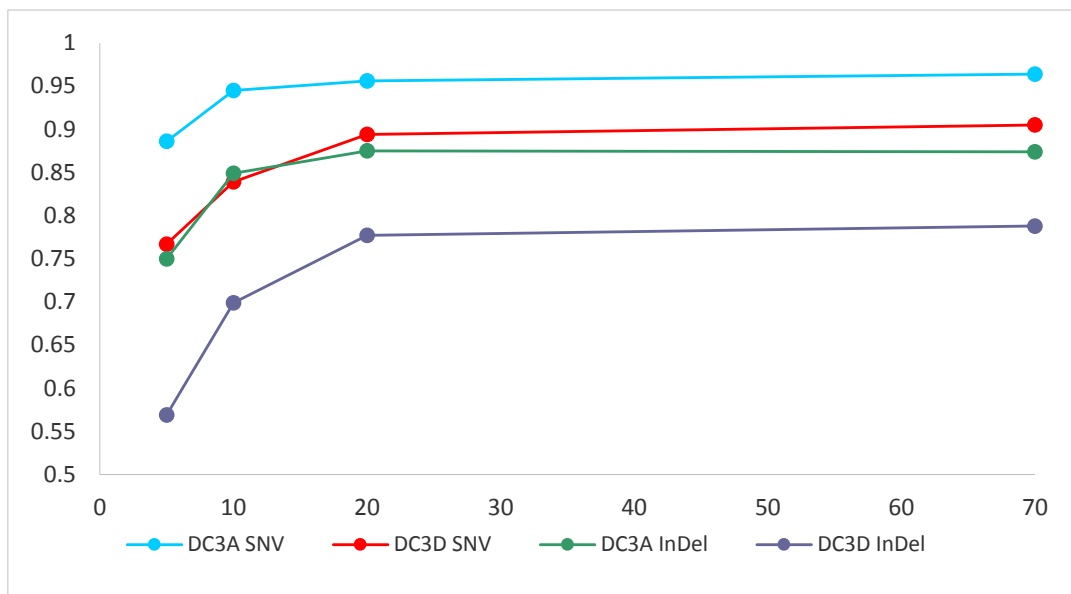

FIGURE 2. The  $F_1$  scores vs. number of features. The gain in accuracy diminishes after around top 20 features with the most predictive values. The detailed data are presented in Table 17.

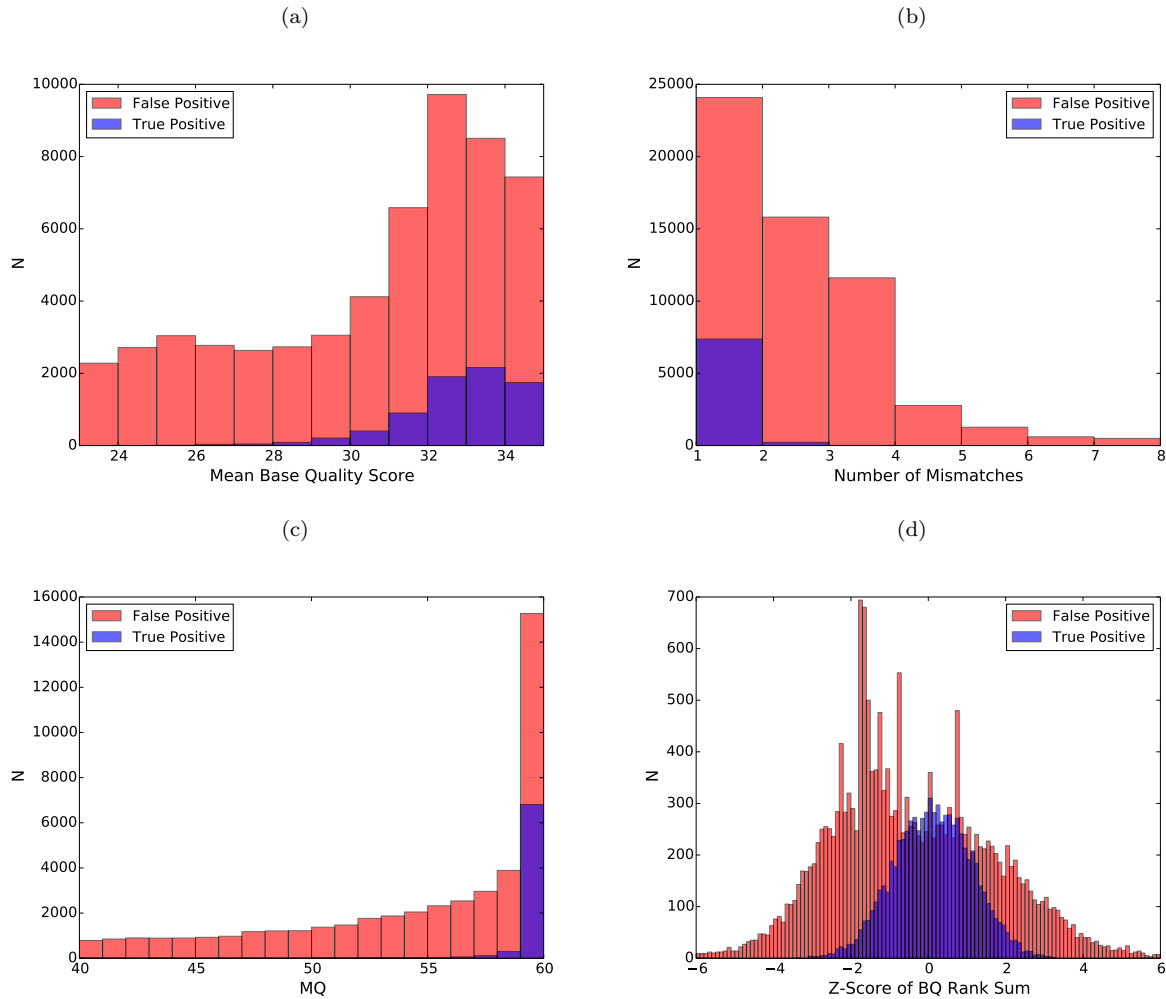

FIGURE 3. (a) Mean base quality score in tumor is often the most important feature in the machine learned classifier. Sequencing errors occur more frequently than somatic mutations. Thus, a variant call based on poor base quality is more likely a sequencing error than a true somatic mutation. (b) Number of mismatches reported by VarDict. The vast majority of the true somatic mutations have one mismatch in the read: the variant base itself. (c) Root-mean-square mapping quality (MQ) score of the tumor reads. MQ is a strong predictor, showing that almost all true somatic mutations have MQ above 57. (d) z-score of base quality rank sum between the reference and alternate reads in tumor reads. It is a measure of base quality bias between the reference and alternate reads. This is a weaker predictor than BQ, but also holds value as large-magnitude z-scores are enriched with false positives comparing to z-scores close to 0. All figures here are generated from Stage 3 of DREAM Challenge data.

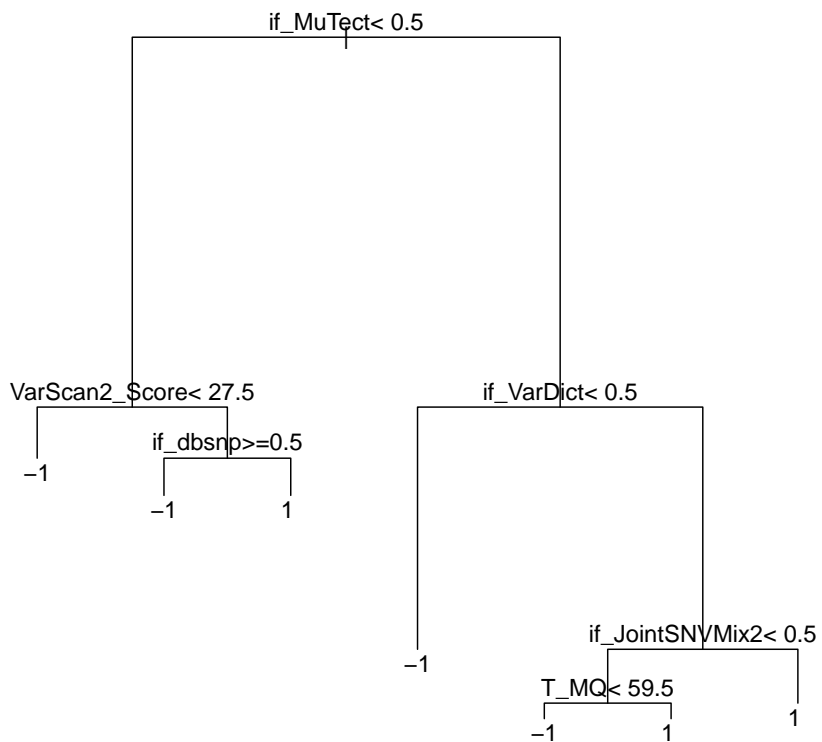

FIGURE 4. The first of 1000 decision trees from the combined data set of DREAM Settings A and B. T\_MQ denotes the root mean square mapping quality score of the tumor.

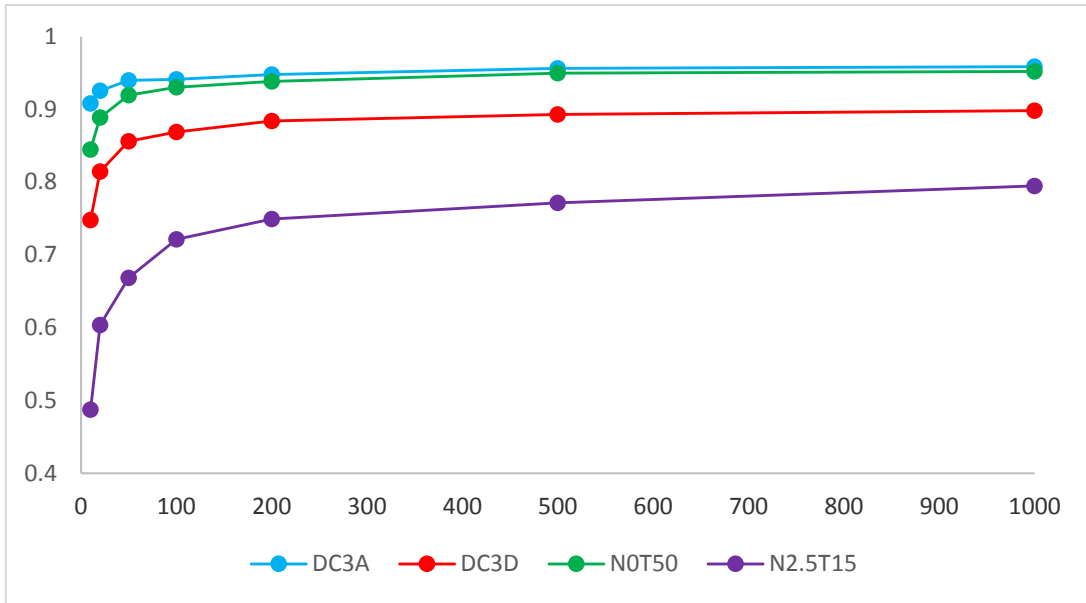

FIGURE 5. The  $F_1$  scores vs. size of the training data set (number of true positives). The gain in accuracy diminishes as the size increases. The detailed data are presented in Table 18. For comparison, the best individual tool's  $F_1$  scores were 0.789 (MuTect), 0.624 (MuTect), 0.607 (SomaticSniper) and 0.296 (VarDict) for DC3A, DC3D,  $N_0T_{50}$ , and  $N_{2.5}T_{15}$ , respectively.

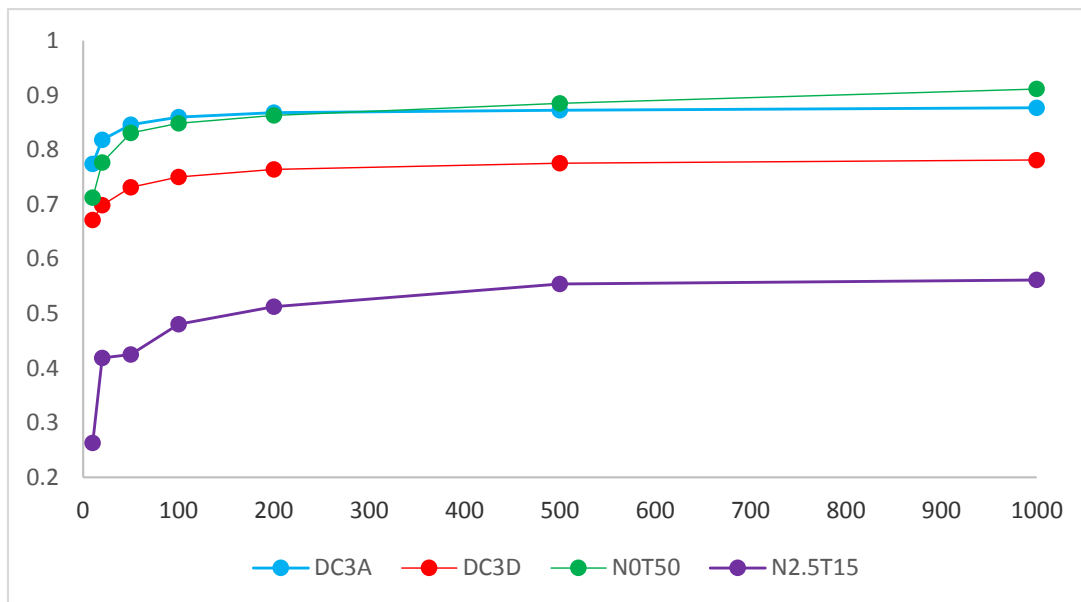

FIGURE 6. The  $F_1$  scores vs. size of the training data set (number of true positives) for INDELS. The gain in accuracy diminishes as the size increases. The detailed data are presented in Table 19. For comparison, the best individual tool's  $F_1$  scores were 0.707 (VarDict), 0.525 (VarDict), 0.729 (Indelocator), and 0.165 (VarDict) for DC3A, DC3D,  $N_0T_{50}$ , and  $N_{2.5}T_{15}$ , respectively.

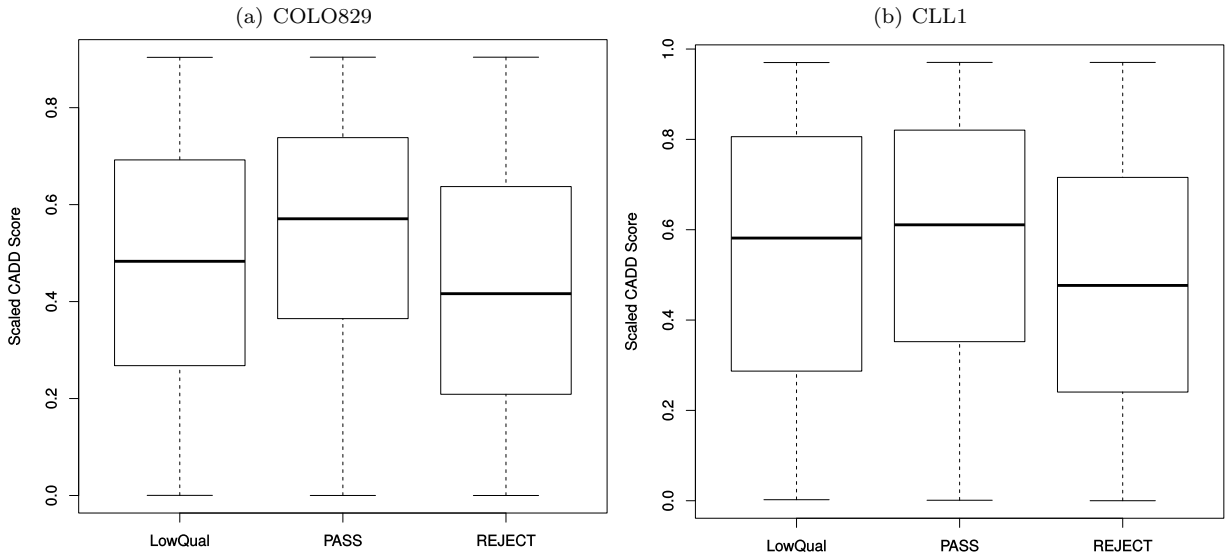

FIGURE 7. CADD rankscores for all SNVs reported by SomaticSeq for (a) COLO829 and (b) CLL1.
